# Supplementary material for: Integrated multi-omics analysis reveals key genetic, metabolic, and microbial drivers in bladder cancer insights into molecular subtyping and therapeutic approaches: A tumor marker prognostic study
Source: Research Square preprint supplement (doi:10.21203/rs.3.rs-5898970/v1), 2025-01-28
Supplement: Supplementary file 1 [file 03b35031ae69aa4bba2e170a.xlsx]

## Sheet: Table S1
Supplementary Table 1: Detailed information table for drive colonies
S_ID	n(control)	n(case)	core(case)	Union	Intersect	Exclusive	Jaccard-score	NESH-score	DelBet	COM
Capnocytophaga	4	1	1	4	1	0	0.25	0.75	0	5
Coprococcus	4	1	1	4	1	0	0.25	0.75	0	4
Fusobacterium	1	1	1	2	0	1	0	2	0	3
Granulicatella	1	2	2	3	0	2	0	2.667	0	1
Nocardiopsis	1	2	2	3	0	2	0	2.667	0	2
Propionicimonas	4	1	1	4	1	0	0.25	0.75	0	5
Roseburia	4	1	1	4	1	0	0.25	0.75	0	4
Ruminococcus	4	1	1	5	0	1	0	1.7	0	3
Saccharopolyspora	4	2	2	6	0	2	0	2.333	0	2
Sutterella	4	2	2	6	0	2	0	2.333	0	2
Tessaracoccus	1	2	2	3	0	2	0	2.667	0	1
Undibacterium	4	2	2	6	0	2	0	2.333	0	1

## Sheet: Table S2
Supplementary Table 2: GSEA for high and low expression set of AHNAK in TCGA-BLCA
	ID	Description	setSize	enrichmentScore	NES	pvalue	p.adjust	qvalue	rank	leading_edge	core_enrichment
KEGG_OLFACTORY_TRANSDUCTION	KEGG_OLFACTORY_TRANSDUCTION	KEGG_OLFACTORY_TRANSDUCTION	369	-0.413001	-1.69856	5.2334e-08	9.62945e-06	8.20817e-06	3532	tags=51%, list=20%, signal=42%	OR4D1/OR12D2/OR2Z1/OR2M3/OR6K2/OR2T3/OR1A2/OR52M1/OR8H1/OR6C65/OR14A16/OR2T6/OR8K1/OR5D14/OR1S1/OR5T1/OR4F17/OR5AR1/OR8H3/OR4C46/OR2D3/OR51M1/OR2AE1/OR5K2/OR51A7/OR6K6/OR51D1/OR5J2/OR2T1/OR4C12/OR14C36/OR51S1/OR1S2/OR2T12/OR4K5/OR4C13/OR2A7/OR2A42/OR10AD1/OR11H6/PRKX/OR5C1/OR2A5/OR10S1/OR13C4/OR4K1/OR8H2/OR7A10/OR4C15/OR4D2/OR4C3/OR10Z1/OR2M5/OR10G4/OR5B3/OR6X1/OR2T5/OR1A1/OR4A15/OR51A2/OR13D1/OR…
KEGG_INTESTINAL_IMMUNE_NETWORK_FOR_IGA_PRODUCTION	KEGG_INTESTINAL_IMMUNE_NETWORK_FOR_IGA_PRODUCTION	KEGG_INTESTINAL_IMMUNE_NETWORK_FOR_IGA_PRODUCTION	46	-0.676787	-2.10394	1.38128e-05	0.00127078	0.00108322	2557	tags=57%, list=14%, signal=49%	CXCR4/TNFSF13B/CCR9/HLA-DPA1/IL15RA/HLA-DPB1/HLA-DMB/CXCL12/HLA-DRB5/CD40/HLA-DQB1/CCL25/TNFRSF17/IL5/ICOS/CD80/CD40LG/HLA-DQA1/ICOSLG/CD86/CD28/HLA-DOB/TNFRSF13B/AICDA/IL2/PIGR
KEGG_HEMATOPOIETIC_CELL_LINEAGE	KEGG_HEMATOPOIETIC_CELL_LINEAGE	KEGG_HEMATOPOIETIC_CELL_LINEAGE	84	-0.565811	-1.91353	4.05984e-05	0.00249004	0.00212252	2107	tags=39%, list=12%, signal=35%	FLT3/CD7/IL3/CD1C/HLA-DRB5/CD22/CD33/CD4/CSF1R/CSF3/TPO/IL5/CD3E/CD2/CD3D/FCGR1A/IL5RA/CD14/ITGAM/IL2RA/MS4A1/GP5/IL1A/ANPEP/CSF2/CR1/DNTT/IL9R/CD37/TNF/CD19/FCER2/CR2
KEGG_LEISHMANIA_INFECTION	KEGG_LEISHMANIA_INFECTION	KEGG_LEISHMANIA_INFECTION	69	-0.576304	-1.903	5.76084e-05	0.00264999	0.00225886	2302	tags=39%, list=13%, signal=34%	HLA-DPA1/NCF2/HLA-DPB1/HLA-DMB/ITGB2/HLA-DRB5/CYBA/PTPN6/MAPK11/HLA-DQB1/FCGR2A/MAPK12/C3/HLA-DQA1/TLR2/FCGR1A/NOS2/PRKCB/TGFB2/IL12A/NCF4/ITGAM/NCF1/HLA-DOB/IL1A/CR1/TNF
KEGG_PRIMARY_IMMUNODEFICIENCY	KEGG_PRIMARY_IMMUNODEFICIENCY	KEGG_PRIMARY_IMMUNODEFICIENCY	35	-0.705335	-2.07628	9.53397e-05	0.0035085	0.00299066	1426	tags=51%, list=8%, signal=47%	JAK3/IGLL1/BLNK/CD4/CD40/CD3E/ICOS/PTPRC/CD3D/CD40LG/CIITA/LCK/CD79A/BTK/TNFRSF13B/AICDA/CD19/AIRE
KEGG_NEUROACTIVE_LIGAND_RECEPTOR_INTERACTION	KEGG_NEUROACTIVE_LIGAND_RECEPTOR_INTERACTION	KEGG_NEUROACTIVE_LIGAND_RECEPTOR_INTERACTION	271	0.483494	1.52094	0.00013089	0.00401395	0.0034215	3145	tags=40%, list=18%, signal=34%	MTNR1B/F2/CCKBR/NTSR1/GABRP/GRM6/CHRM2/NPY1R/TACR2/CHRNB3/GPR50/RXFP2/CHRNA9/GRM8/AGTR2/GRIK3/UTS2R/HTR1B/GCGR/GHR/MLNR/GRID2/PLG/P2RX2/FSHR/GRM7/GABRQ/GRIA2/DRD2/NMUR2/CRHR1/ADRA1A/GRIA1/GALR1/GHRHR/GPR83/PTGFR/BDKRB1/PRLHR/ADRA2B/CHRNG/LPAR4/MCHR1/HTR1E/CHRNA3/ADCYAP1R1/CHRM1/NPFFR1/GABRB3/GRIK5/GPR156/ADRB3/PRL/P2RX1/GLP2R/GLRA2/GRIA3/PRSS3/GALR2/CYSLTR1/CHRNA1/EDNRB/GLRB/PRLR/CALCRL/NTSR2/GRI…
KEGG_RIBOSOME	KEGG_RIBOSOME	KEGG_RIBOSOME	87	-0.533656	-1.82794	0.000175571	0.004615	0.00393384	5994	tags=66%, list=33%, signal=44%	RPL23A/RPL17/RPS18/RPS12/RPS6/RPL35/RPL22/RPL36AL/RPL26/RPL32/RPL37A/RPL29/RPL9/RPL24/RPL38/RPS5/RPL30/RPL3/RPS26/RPS20/RPS8/RPS27/RPLP0/RPL22L1/RPS27A/RPL18A/RPS21/RPL21/RPS15/RPSA/RPS3/RPL39/RPL14/UBA52/RPL12/RPL8/RPS2/RPS11/RPS29/RPS4X/RPS9/RPL13A/RPL37/RPL6/RPL34/RPL27A/RPL13/RPL18/RPS28/RPL36A/RPLP1/FAU/RPS19/RPLP2/RPL36/RPL28/RPL10L
KEGG_CYTOKINE_CYTOKINE_RECEPTOR_INTERACTION	KEGG_CYTOKINE_CYTOKINE_RECEPTOR_INTERACTION	KEGG_CYTOKINE_CYTOKINE_RECEPTOR_INTERACTION	260	-0.381081	-1.54154	0.000220404	0.00506928	0.00432107	2557	tags=34%, list=14%, signal=29%	CXCR4/IL20RA/PLEKHO2/IL18/IFNA2/TNFSF13B/IFNA17/RELT/CCR9/EGF/IFNA21/CCL26/MET/TNFRSF21/IL22/IFNA14/TNFSF12/FLT3/VEGFB/IL15RA/CXCL12/IL3/CCL3/CCR2/IL18R1/INHBA/HGF/CCL19/IL22RA2/CCL15/IL24/OSM/IL10RA/CSF1R/CD40/CXCL2/CSF3/TNFRSF14/CXCR3/TPO/CCL25/IFNL3/TNFRSF17/CCL21/CCL22/IL5/CCL3L3/TNFRSF9/IFNA13/CD40LG/CCL23/CNTFR/CCR4/IL5RA/IL21/CXCL11/CCL5/TGFB2/IL12A/CCR6/TNFSF8/IL19/CXCL13/CCL8/IL2RA/LTA/C…
KEGG_TOLL_LIKE_RECEPTOR_SIGNALING_PATHWAY	KEGG_TOLL_LIKE_RECEPTOR_SIGNALING_PATHWAY	KEGG_TOLL_LIKE_RECEPTOR_SIGNALING_PATHWAY	102	-0.499087	-1.7563	0.000358023	0.00731958	0.00623923	2783	tags=33%, list=15%, signal=28%	MAPK10/PIK3R1/CTSK/STAT1/IFNA2/IFNA17/TLR1/IFNA21/IFNA14/TLR8/IRF3/CCL3/PIK3R2/PIK3R5/CD40/MAPK11/PIK3CD/MAPK12/IFNA13/TLR6/CD80/LY96/IKBKE/TLR2/CD86/CD14/CXCL11/CCL5/IL12A/PIK3CG/CXCL9/IFNA6/LBP/TNF
KEGG_T_CELL_RECEPTOR_SIGNALING_PATHWAY	KEGG_T_CELL_RECEPTOR_SIGNALING_PATHWAY	KEGG_T_CELL_RECEPTOR_SIGNALING_PATHWAY	107	-0.483478	-1.71443	0.00043339	0.00742402	0.00632826	1537	tags=32%, list=9%, signal=29%	GRAP2/PIK3R1/CD3G/CTLA4/CBLC/HRAS/PPP3R2/LCP2/PTPN6/PIK3R2/CARD11/CD4/PIK3R5/MAPK11/NFKBIE/PRKCQ/PIK3CD/MAPK12/IL5/CD3E/ICOS/PTPRC/ITK/CD3D/NFATC2/VAV1/CD40LG/PDCD1/LCK/CD28/PIK3CG/CSF2/TNF/IL2
KEGG_B_CELL_RECEPTOR_SIGNALING_PATHWAY	KEGG_B_CELL_RECEPTOR_SIGNALING_PATHWAY	KEGG_B_CELL_RECEPTOR_SIGNALING_PATHWAY	75	-0.529183	-1.75019	0.000443827	0.00742402	0.00632826	2261	tags=32%, list=13%, signal=28%	HRAS/LILRB3/RAC2/PPP3R2/CD22/PTPN6/PIK3AP1/PIK3R2/BLNK/CARD11/PIK3R5/NFKBIE/PIK3CD/NFATC2/VAV1/PRKCB/CD79A/PLCG2/PIK3CG/BTK/CD72/CD79B/CD19/CR2
KEGG_CHEMOKINE_SIGNALING_PATHWAY	KEGG_CHEMOKINE_SIGNALING_PATHWAY	KEGG_CHEMOKINE_SIGNALING_PATHWAY	184	-0.402055	-1.54235	0.000521691	0.00799927	0.0068186	2564	tags=29%, list=14%, signal=25%	STAT1/CXCR4/FGR/CCR9/CCL26/JAK3/HRAS/SHC3/GNG4/RAC2/ADCY3/CXCL12/PTK2B/CCL3/CCR2/GNGT2/CCL19/ADCY2/CCL15/PRKACG/PIK3R2/PIK3R5/CXCL2/CXCR3/PIK3CD/CCL25/CCL21/CCL22/CCL3L3/HCK/ITK/VAV1/CCL23/CCR4/RASGRP2/GNG8/CXCL11/PRKCB/CCL5/CCR6/ADCY8/CXCL13/NCF1/CCL8/PIK3CG/CXCL9/DOCK2/WAS/CCL17/CXCL3/CCL18/PF4/PF4V1/CCL13
KEGG_AUTOIMMUNE_THYROID_DISEASE	KEGG_AUTOIMMUNE_THYROID_DISEASE	KEGG_AUTOIMMUNE_THYROID_DISEASE	50	-0.544259	-1.70229	0.00156051	0.0220872	0.0188272	2589	tags=48%, list=14%, signal=41%	CTLA4/IFNA2/IFNA17/IFNA21/HLA-DPA1/IFNA14/HLA-DPB1/HLA-DMB/HLA-DRB5/CD40/HLA-DQB1/TPO/IL5/IFNA13/CD80/CD40LG/HLA-DQA1/CD86/TSHB/CD28/HLA-DOB/TSHR/IFNA6/IL2
KEGG_PRIMARY_BILE_ACID_BIOSYNTHESIS	KEGG_PRIMARY_BILE_ACID_BIOSYNTHESIS	KEGG_PRIMARY_BILE_ACID_BIOSYNTHESIS	16	0.782337	1.72742	0.00200289	0.0263237	0.0224384	2610	tags=62%, list=15%, signal=53%	BAAT/CYP8B1/AKR1D1/ACOX2/AMACR/CYP39A1/CYP46A1/CYP7A1/CH25H/CYP27A1
KEGG_ALLOGRAFT_REJECTION	KEGG_ALLOGRAFT_REJECTION	KEGG_ALLOGRAFT_REJECTION	35	-0.609964	-1.79554	0.00384986	0.047225	0.0402547	2302	tags=46%, list=13%, signal=40%	HLA-DPA1/HLA-DPB1/HLA-DMB/HLA-DRB5/CD40/HLA-DQB1/IL5/CD80/CD40LG/HLA-DQA1/CD86/IL12A/CD28/HLA-DOB/TNF/IL2
KEGG_SYSTEMIC_LUPUS_ERYTHEMATOSUS	KEGG_SYSTEMIC_LUPUS_ERYTHEMATOSUS	KEGG_SYSTEMIC_LUPUS_ERYTHEMATOSUS	54	-0.506209	-1.60683	0.0043334	0.0498341	0.0424788	2302	tags=46%, list=13%, signal=40%	HLA-DPA1/C8A/C1R/HLA-DPB1/HLA-DMB/HLA-DRB5/CD40/HLA-DQB1/FCGR2A/CD80/CD40LG/C3/HLA-DQA1/FCGR1A/CD86/C8G/C7/C1QC/ELANE/C1QB/CD28/HLA-DOB/C6/C1QA/TNF
KEGG_NOD_LIKE_RECEPTOR_SIGNALING_PATHWAY	KEGG_NOD_LIKE_RECEPTOR_SIGNALING_PATHWAY	KEGG_NOD_LIKE_RECEPTOR_SIGNALING_PATHWAY	61	-0.487657	-1.5902	0.00880621	0.0948418	0.0808434	2108	tags=23%, list=12%, signal=20%	PSTPIP1/NOD1/NLRP3/CXCL2/MAPK11/PYCARD/MAPK12/CCL5/BIRC3/CCL8/CASP5/PYDC1/TNF/CCL13
KEGG_MATURITY_ONSET_DIABETES_OF_THE_YOUNG	KEGG_MATURITY_ONSET_DIABETES_OF_THE_YOUNG	KEGG_MATURITY_ONSET_DIABETES_OF_THE_YOUNG	25	0.689455	1.64159	0.009278	0.0948418	0.0808434	2011	tags=56%, list=11%, signal=50%	HNF1A/NEUROD1/NKX6-1/INS/GCK/IAPP/SLC2A2/NKX2-2/NEUROG3/HNF4A/ONECUT1/MAFA/NR5A2/PDX1
KEGG_ARRHYTHMOGENIC_RIGHT_VENTRICULAR_CARDIOMYOPATHY_ARVC	KEGG_ARRHYTHMOGENIC_RIGHT_VENTRICULAR_CARDIOMYOPATHY_ARVC	KEGG_ARRHYTHMOGENIC_RIGHT_VENTRICULAR_CARDIOMYOPATHY_ARVC	74	0.543123	1.51874	0.0122223	0.108608	0.0925779	3328	tags=35%, list=19%, signal=29%	CACNG5/SGCG/CACNA1S/CACNA1C/ACTN2/CDH2/CACNB2/CACNG2/GJA1/ITGA10/CTNNA3/ITGA7/CACNG6/ITGA1/SGCD/DSP/ITGA11/CACNG8/ITGA5/LAMA2/DMD/CACNA2D2/LEF1/SGCA/RYR2/SGCB
KEGG_CYTOSOLIC_DNA_SENSING_PATHWAY	KEGG_CYTOSOLIC_DNA_SENSING_PATHWAY	KEGG_CYTOSOLIC_DNA_SENSING_PATHWAY	52	-0.491661	-1.53924	0.0123189	0.108608	0.0925779	5492	tags=62%, list=31%, signal=43%	MAVS/POLR3H/RELA/IFNA4/POLR3G/POLR3F/NFKBIB/IFNA7/POLR1C/IL1B/CCL4/NFKBIA/POLR3GL/ADAR/IFNA16/AIM2/IFNA5/IKBKB/IRF7/POLR3C/IL18/IFNA2/IFNA17/IFNA21/IFNA14/IRF3/RIPK3/PYCARD/IFNA13/IKBKE/CCL5/IFNA6
KEGG_PROXIMAL_TUBULE_BICARBONATE_RECLAMATION	KEGG_PROXIMAL_TUBULE_BICARBONATE_RECLAMATION	KEGG_PROXIMAL_TUBULE_BICARBONATE_RECLAMATION	23	0.680202	1.59042	0.0123955	0.108608	0.0925779	2846	tags=48%, list=16%, signal=40%	ATP1A2/SLC38A3/SLC9A3/PCK1/ATP1B2/CA4/GLUD2/ATP1B1/CA2/ATP1B4/ATP1B3
KEGG_COMPLEMENT_AND_COAGULATION_CASCADES	KEGG_COMPLEMENT_AND_COAGULATION_CASCADES	KEGG_COMPLEMENT_AND_COAGULATION_CASCADES	69	0.546563	1.51303	0.0134047	0.112112	0.0955646	2318	tags=38%, list=13%, signal=33%	F2/FGB/F9/FGG/KNG1/F13B/FGA/F11/SERPINC1/SERPIND1/PLG/C8B/MASP1/BDKRB1/F7/MBL2/PLAT/C4A/THBD/SERPINF2/C4B/PROC/C4BPA/A2M/F10/MASP2
KEGG_GRAFT_VERSUS_HOST_DISEASE	KEGG_GRAFT_VERSUS_HOST_DISEASE	KEGG_GRAFT_VERSUS_HOST_DISEASE	37	-0.543539	-1.61874	0.022193	0.171794	0.146438	2302	tags=43%, list=13%, signal=38%	HLA-DPA1/HLA-DPB1/HLA-DMB/HLA-DRB5/KIR3DL2/KIR2DL1/HLA-DQB1/KIR3DL1/CD80/HLA-DQA1/CD86/CD28/HLA-DOB/IL1A/TNF/IL2
KEGG_FC_EPSILON_RI_SIGNALING_PATHWAY	KEGG_FC_EPSILON_RI_SIGNALING_PATHWAY	KEGG_FC_EPSILON_RI_SIGNALING_PATHWAY	79	-0.42133	-1.40403	0.0224992	0.171794	0.146438	2783	tags=32%, list=15%, signal=27%	MAPK10/PIK3R1/PLA2G6/PLA2G1B/HRAS/FCER1A/RAC2/IL3/LCP2/PIK3R2/PIK3R5/MAPK11/PIK3CD/MAPK12/IL5/VAV1/PRKCB/PLA2G4A/PLCG2/PIK3CG/BTK/CSF2/PLA2G2D/TNF/PLA2G3
KEGG_GLYCOSAMINOGLYCAN_DEGRADATION	KEGG_GLYCOSAMINOGLYCAN_DEGRADATION	KEGG_GLYCOSAMINOGLYCAN_DEGRADATION	21	0.664095	1.53598	0.0239091	0.171794	0.146438	1493	tags=19%, list=8%, signal=17%	SPAM1/HYAL1/HS3ST3A1/HPSE2
KEGG_ECM_RECEPTOR_INTERACTION	KEGG_ECM_RECEPTOR_INTERACTION	KEGG_ECM_RECEPTOR_INTERACTION	83	0.508775	1.44148	0.0243855	0.171794	0.146438	3080	tags=36%, list=17%, signal=30%	COL2A1/VTN/COL6A6/RELN/SPP1/CHAD/COL11A2/SV2B/GP9/ITGA10/CD36/TNXB/ITGA7/LAMC3/ITGA1/SV2A/IBSP/HSPG2/COL6A1/THBS4/ITGA11/ITGA5/LAMA2/COL6A3/COL4A1/COL5A3/LAMA4/COL4A2/TNC/GP6
KEGG_TGF_BETA_SIGNALING_PATHWAY	KEGG_TGF_BETA_SIGNALING_PATHWAY	KEGG_TGF_BETA_SIGNALING_PATHWAY	85	0.504482	1.43447	0.0252089	0.171794	0.146438	2580	tags=28%, list=14%, signal=24%	BMP7/LEFTY1/ID4/BMP4/PITX2/GDF6/BMP8B/NODAL/SMAD9/AMHR2/ID3/GDF5/BMPR1B/AMH/SMAD6/ID2/THBS4/FST/CDKN2B/ACVR1C/INHBC/LEFTY2/BMP8A/BMP5
KEGG_JAK_STAT_SIGNALING_PATHWAY	KEGG_JAK_STAT_SIGNALING_PATHWAY	KEGG_JAK_STAT_SIGNALING_PATHWAY	155	-0.344366	-1.27874	0.0299257	0.196655	0.167629	2564	tags=27%, list=14%, signal=23%	STAT1/IL20RA/CBLC/IFNA2/IFNA17/IFNA21/JAK3/IL22/IFNA14/IL15RA/IL3/IL22RA2/IL24/PTPN6/PIK3R2/OSM/IL10RA/STAT5A/PIK3R5/CSF3/TPO/PIK3CD/IFNL3/IL5/IFNA13/CNTFR/IL5RA/IL21/IL12A/IL19/IL2RA/PIK3CG/CSF2RB/CSH1/CSF2/IFNA6/LEP/IL9R/IL2/IL21R/GH1/IL26
KEGG_MELANOMA	KEGG_MELANOMA	KEGG_MELANOMA	71	-0.430841	-1.41389	0.0334395	0.212168	0.180853	1664	tags=25%, list=9%, signal=23%	PIK3R1/TP53/BAD/EGF/MET/HRAS/E2F1/HGF/PIK3R2/PDGFD/PIK3R5/PIK3CD/FGF16/IGF1/PIK3CG/FGF19/FGF4/FGF3
KEGG_ANTIGEN_PROCESSING_AND_PRESENTATION	KEGG_ANTIGEN_PROCESSING_AND_PRESENTATION	KEGG_ANTIGEN_PROCESSING_AND_PRESENTATION	80	-0.399292	-1.33916	0.0378453	0.232118	0.197858	3170	tags=40%, list=18%, signal=33%	IFI30/RFXANK/RFX5/HLA-DRA/CD74/PSME1/PSME2/CTSS/KLRC4/IFNA2/IFNA17/IFNA21/HLA-DPA1/IFNA14/HLA-DPB1/TAPBP/HLA-DMB/HSPA1A/KLRC3/HLA-DRB5/KIR3DL2/CD4/KIR2DL1/HLA-DQB1/KIR3DL1/IFNA13/CIITA/HLA-DQA1/KIR3DL3/LTA/HLA-DOB/IFNA6
KEGG_TRYPTOPHAN_METABOLISM	KEGG_TRYPTOPHAN_METABOLISM	KEGG_TRYPTOPHAN_METABOLISM	39	-0.48868	-1.47127	0.0420771	0.249748	0.212886	2174	tags=28%, list=12%, signal=25%	OGDHL/AADAT/MAOB/ALDH2/KMO/ALDH3A2/KYNU/INMT/CYP1B1/CYP1A1/CYP1A2
KEGG_FC_GAMMA_R_MEDIATED_PHAGOCYTOSIS	KEGG_FC_GAMMA_R_MEDIATED_PHAGOCYTOSIS	KEGG_FC_GAMMA_R_MEDIATED_PHAGOCYTOSIS	92	-0.383201	-1.31472	0.0464761	0.253079	0.215725	2251	tags=23%, list=13%, signal=20%	ARPC4/PLD2/RAC2/ARPC1B/PIK3R2/PRKCG/PIK3R5/FCGR2A/PIK3CD/PTPRC/HCK/VAV1/FCGR1A/PRKCB/PLA2G4A/NCF1/PLCG2/PIK3CG/DOCK2/WAS/PLA2G4D
KEGG_NATURAL_KILLER_CELL_MEDIATED_CYTOTOXICITY	KEGG_NATURAL_KILLER_CELL_MEDIATED_CYTOTOXICITY	KEGG_NATURAL_KILLER_CELL_MEDIATED_CYTOTOXICITY	131	-0.352283	-1.30408	0.0478109	0.253079	0.215725	3317	tags=36%, list=18%, signal=29%	FCER1G/SOS1/NFATC1/TYROBP/MICA/BID/ICAM1/PIK3R1/SH2D1B/MICB/IFNA2/IFNA17/IFNA21/HRAS/SHC3/IFNA14/RAC2/ITGB2/PTK2B/PPP3R2/KLRC3/NCR1/LCP2/PTPN6/KIR3DL2/PIK3R2/PRKCG/KIR2DL1/PIK3R5/PIK3CD/KIR3DL1/NCR2/IFNA13/NFATC2/VAV1/ITGAL/SH2D1A/PRKCB/HCST/LCK/PLCG2/PIK3CG/NCR3/CD48/CSF2/IFNA6/TNF
KEGG_RIBOFLAVIN_METABOLISM	KEGG_RIBOFLAVIN_METABOLISM	KEGG_RIBOFLAVIN_METABOLISM	14	0.68625	1.45771	0.0479876	0.253079	0.215725	615	tags=14%, list=3%, signal=14%	TYR/ENPP1
KEGG_CALCIUM_SIGNALING_PATHWAY	KEGG_CALCIUM_SIGNALING_PATHWAY	KEGG_CALCIUM_SIGNALING_PATHWAY	177	0.424565	1.30726	0.04814	0.253079	0.215725	3364	tags=31%, list=19%, signal=25%	CCKBR/NTSR1/CALML5/CHRM2/TACR2/CAMK2B/CACNA1E/P2RX2/ATP2B2/CACNA1B/CACNA1S/ADRA1A/CACNA1C/NOS1/PTGFR/BDKRB1/ATP2B3/CHRM1/SLC8A3/CHP2/CACNA1H/ADRB3/PLN/P2RX1/MYLK/GNAL/CALML3/CYSLTR1/SLC8A2/EDNRB/CACNA1A/ADRB2/MYLK3/PLCD4/ITPKA/ERBB4/LTB4R2/CCKAR/ATP2A1/GRPR/CYSLTR2/HTR7/CHRM5/BDKRB2/SPHK2/CHRM3/P2RX3/RYR2/PRKCA/EDNRA/PDE1C/ATP2A3/PHKG1/PDGFRB

## Sheet: Table S3
Supplementary Table 3: GSEA for high and low expression set of CSPG4 in TCGA-BLCA
	ID	Description	setSize	enrichmentScore	NES	pvalue	p.adjust	qvalue	rank	leading_edge	core_enrichment
KEGG_NATURAL_KILLER_CELL_MEDIATED_CYTOTOXICITY	KEGG_NATURAL_KILLER_CELL_MEDIATED_CYTOTOXICITY	KEGG_NATURAL_KILLER_CELL_MEDIATED_CYTOTOXICITY	121	-0.642368	-2.25478	5.8702e-11	1.08012e-08	7.72394e-09	2913	tags=49%, list=17%, signal=41%	ULBP2/PIK3R3/CD244/IFNA5/HLA-C/NCR3/TNFSF10/RAF1/NFATC2/ICAM2/HLA-B/RAC3/HLA-E/HLA-A/KIR2DL4/ZAP70/PTPN6/IFNB1/KLRC3/LAT/VAV2/PRKCG/PIK3R2/PLCG2/NFATC1/PTK2B/CD247/ULBP1/PIK3R5/IFNA21/PIK3CD/KLRK1/KIR2DL3/PIK3CG/KLRC1/RAC2/LCP2/TYROBP/KLRD1/PRF1/KLRC2/ITGB2/KIR2DL1/VAV1/PRKCB/KIR3DL1/HLA-G/FCER1G/GZMB/SH2D1A/ITGAL/HCST/KIR3DL2/CD48/FCGR3A/PPP3R2/LCK/FASLG/IFNG
KEGG_ANTIGEN_PROCESSING_AND_PRESENTATION	KEGG_ANTIGEN_PROCESSING_AND_PRESENTATION	KEGG_ANTIGEN_PROCESSING_AND_PRESENTATION	70	-0.727521	-2.36042	1.73207e-10	1.59351e-08	1.13952e-08	2947	tags=66%, list=17%, signal=55%	RFX5/TAP2/IFNA5/HLA-C/CTSS/HLA-DPA1/HLA-B/HLA-E/TAPBP/PSME1/TAP1/HLA-A/KIR2DL4/HLA-F/KLRC3/HSPA1A/HLA-DOA/IFI30/IFNA21/PSME2/HLA-DRB1/KLRC4/HLA-DMA/KIR3DL3/KIR2DL3/HLA-DMB/HLA-DRA/KLRC1/HLA-DQB1/CD74/KLRD1/HLA-DPB1/CD4/KLRC2/HLA-DQA2/KIR2DL1/CIITA/KIR3DL1/HLA-DRB5/HLA-G/HLA-DQA1/LTA/KIR3DL2/HLA-DOB/CD8B/CD8A
KEGG_AUTOIMMUNE_THYROID_DISEASE	KEGG_AUTOIMMUNE_THYROID_DISEASE	KEGG_AUTOIMMUNE_THYROID_DISEASE	40	-0.791458	-2.33384	5.43821e-09	3.33543e-07	2.38518e-07	2902	tags=85%, list=17%, signal=71%	IL4/IFNA5/HLA-C/TSHB/HLA-DPA1/HLA-B/HLA-E/HLA-A/HLA-F/CD40/HLA-DOA/CD28/IFNA21/HLA-DRB1/CD86/HLA-DMA/CTLA4/HLA-DMB/HLA-DRA/HLA-DQB1/CD40LG/HLA-DPB1/PRF1/CD80/HLA-DQA2/HLA-DRB5/HLA-G/HLA-DQA1/GZMB/TSHR/HLA-DOB/FASLG/CGA/IL2
KEGG_ALLOGRAFT_REJECTION	KEGG_ALLOGRAFT_REJECTION	KEGG_ALLOGRAFT_REJECTION	35	-0.810454	-2.31266	8.98395e-09	4.13262e-07	2.95525e-07	2267	tags=80%, list=13%, signal=70%	HLA-DPA1/HLA-B/HLA-E/HLA-A/IL12B/HLA-F/CD40/HLA-DOA/CD28/HLA-DRB1/CD86/HLA-DMA/HLA-DMB/HLA-DRA/HLA-DQB1/CD40LG/HLA-DPB1/PRF1/CD80/HLA-DQA2/HLA-DRB5/HLA-G/HLA-DQA1/GZMB/HLA-DOB/FASLG/IL2/IFNG
KEGG_PRIMARY_IMMUNODEFICIENCY	KEGG_PRIMARY_IMMUNODEFICIENCY	KEGG_PRIMARY_IMMUNODEFICIENCY	35	-0.802877	-2.29104	2.16403e-08	7.08414e-07	5.06589e-07	2079	tags=71%, list=12%, signal=63%	IL2RG/TAP1/ZAP70/BLNK/CD40/RAG2/ICOS/IL7R/JAK3/PTPRC/CD40LG/CD4/AIRE/CIITA/IGLL1/CD3D/BTK/CD3E/LCK/CD8B/CD19/CD79A/TNFRSF13B/CD8A/AICDA
KEGG_CYTOKINE_CYTOKINE_RECEPTOR_INTERACTION	KEGG_CYTOKINE_CYTOKINE_RECEPTOR_INTERACTION	KEGG_CYTOKINE_CYTOKINE_RECEPTOR_INTERACTION	247	-0.49011	-1.89994	2.31005e-08	7.08414e-07	5.06589e-07	2971	tags=40%, list=17%, signal=34%	IL23R/CCL16/IL4/CCL23/IL7/IL18/IFNA5/IL15/CX3CL1/FLT3/TNFRSF14/IL24/TNFSF12/CXCL13/PDGFA/PLEKHO2/RELT/CCL7/AMH/IL1R2/TNFSF10/LTB/FLT3LG/CD70/CSF1/TNFSF4/IL2RG/IFNL3/IL12B/IFNB1/CD40/IL9R/CXCR2/IL13/CSF3R/IL15RA/IFNL1/IFNA21/GH1/XCL2/IL22RA2/LEP/IL7R/TNFSF8/CCL22/CCL26/IL10RA/TNFRSF4/IL18RAP/CD40LG/CCR1/TNFRSF8/CCL13/PRLR/IFNW1/TNFSF13B/CCL1/IL5RA/CCL3L3/IFNL2/CCR2/TNFSF14/IL2RA/LTA/CSF1R/IL12RB1/…
KEGG_GRAFT_VERSUS_HOST_DISEASE	KEGG_GRAFT_VERSUS_HOST_DISEASE	KEGG_GRAFT_VERSUS_HOST_DISEASE	37	-0.782721	-2.26863	2.97062e-08	7.80849e-07	5.58388e-07	2267	tags=84%, list=13%, signal=73%	HLA-DPA1/HLA-B/HLA-E/HLA-A/HLA-F/HLA-DOA/CD28/HLA-DRB1/CD86/HLA-DMA/KIR2DL3/HLA-DMB/HLA-DRA/KLRC1/HLA-DQB1/KLRD1/HLA-DPB1/PRF1/CD80/HLA-DQA2/KIR2DL1/KIR3DL1/HLA-DRB5/HLA-G/HLA-DQA1/GZMB/KIR3DL2/HLA-DOB/FASLG/IL2/IFNG
KEGG_COMPLEMENT_AND_COAGULATION_CASCADES	KEGG_COMPLEMENT_AND_COAGULATION_CASCADES	KEGG_COMPLEMENT_AND_COAGULATION_CASCADES	69	-0.657242	-2.12677	2.79169e-07	6.42089e-06	4.5916e-06	1926	tags=46%, list=11%, signal=41%	F12/C4BPB/F3/C8G/SERPING1/CFI/PLAT/SERPINE1/C3AR1/SERPINC1/FGA/C2/CPB2/C3/KNG1/FGG/CFB/C1QC/C1QB/C1QA/C4BPA/SERPINF2/KLKB1/C8B/F11/F2/FGB/F13B/F9/CR2/C8A/MBL2
KEGG_T_CELL_RECEPTOR_SIGNALING_PATHWAY	KEGG_T_CELL_RECEPTOR_SIGNALING_PATHWAY	KEGG_T_CELL_RECEPTOR_SIGNALING_PATHWAY	107	-0.575095	-1.97408	4.83829e-07	9.89161e-06	7.07352e-06	2451	tags=32%, list=14%, signal=27%	NFKBIE/RAF1/NFATC2/CARD11/ZAP70/PTPN6/LAT/ICOS/VAV2/PIK3R2/NFATC1/CD247/CD28/PIK3R5/CTLA4/PIK3CD/ITK/PTPRC/PIK3CG/LCP2/CD40LG/CD4/GRAP2/VAV1/CD3D/CD3G/CD3E/PPP3R2/LCK/PDCD1/CD8B/CD8A/IL2/IFNG
KEGG_SYSTEMIC_LUPUS_ERYTHEMATOSUS	KEGG_SYSTEMIC_LUPUS_ERYTHEMATOSUS	KEGG_SYSTEMIC_LUPUS_ERYTHEMATOSUS	54	-0.684315	-2.12008	1.22443e-06	2.25296e-05	1.6111e-05	1859	tags=54%, list=11%, signal=48%	CD40/C8G/HLA-DOA/FCGR2A/CD28/HLA-DRB1/CD86/HLA-DMA/HLA-DMB/HLA-DRA/C2/HLA-DQB1/CD40LG/C3/HLA-DPB1/CD80/GRIN2B/HLA-DQA2/FCGR1A/HLA-DRB5/HLA-DQA1/C1QC/C1QB/C1QA/HLA-DOB/FCGR3A/C8B/IFNG/C8A
KEGG_INTESTINAL_IMMUNE_NETWORK_FOR_IGA_PRODUCTION	KEGG_INTESTINAL_IMMUNE_NETWORK_FOR_IGA_PRODUCTION	KEGG_INTESTINAL_IMMUNE_NETWORK_FOR_IGA_PRODUCTION	45	-0.714597	-2.13093	1.52604e-06	2.55265e-05	1.82541e-05	1859	tags=56%, list=11%, signal=50%	CD40/HLA-DOA/ICOS/IL15RA/CD28/HLA-DRB1/ITGB7/CD86/HLA-DMA/HLA-DMB/HLA-DRA/HLA-DQB1/CD40LG/HLA-DPB1/CD80/TNFSF13B/HLA-DQA2/HLA-DRB5/HLA-DQA1/HLA-DOB/TNFRSF13B/CCL25/IL2/TNFRSF17/AICDA
KEGG_B_CELL_RECEPTOR_SIGNALING_PATHWAY	KEGG_B_CELL_RECEPTOR_SIGNALING_PATHWAY	KEGG_B_CELL_RECEPTOR_SIGNALING_PATHWAY	75	-0.631276	-2.07624	1.69867e-06	2.60462e-05	1.86257e-05	2451	tags=37%, list=14%, signal=32%	NFKBIE/RAF1/NFATC2/RAC3/CARD11/PTPN6/LILRB3/BLNK/VAV2/PIK3R2/PLCG2/NFATC1/PIK3R5/PIK3CD/IFITM1/PIK3CG/RAC2/VAV1/PRKCB/BTK/PIK3AP1/PPP3R2/CD19/CD79A/CD72/CD79B/CD22/CR2
KEGG_HEMATOPOIETIC_CELL_LINEAGE	KEGG_HEMATOPOIETIC_CELL_LINEAGE	KEGG_HEMATOPOIETIC_CELL_LINEAGE	83	-0.592594	-1.97427	6.69448e-06	9.47526e-05	6.77579e-05	2218	tags=43%, list=13%, signal=38%	FLT3LG/CSF1/GP5/IL9R/GP1BA/CSF3R/ITGA2B/GYPA/CD36/HLA-DRB1/IL7R/CD14/HLA-DRA/CD33/CD4/CD38/ITGAM/IL5RA/FCGR1A/HLA-DRB5/CD3D/CD7/IL2RA/CSF1R/CD3G/CD37/CD3E/CD2/CD8B/DNTT/CD19/CD8A/CD22/CR2/MS4A1/FCER2
KEGG_RIBOSOME	KEGG_RIBOSOME	KEGG_RIBOSOME	87	-0.574362	-1.91743	1.18454e-05	0.000155683	0.000111329	5980	tags=74%, list=34%, signal=48%	RPL22L1/RPL31/RPL8/RPL10A/RPL5/RPL27/RPS25/RPS5/RPS27/RPL18A/RPL4/RPSA/RPLP0/RPS20/RPS13/RPS7/RPL9/RPS19/RPL3/RPL21/RPS27A/RPL13A/UBA52/RPS10/RPL26L1/RPS11/RPL37/RPL7A/RPL26/RPS3/RPL14/RPL29/RPL24/RPL30/RPS18/RPS26/RPL37A/RPL38/RPS2/RPL35/RPS8/RPLP1/RPL23A/RPS9/RPS21/RPS28/RPL6/RPL36A/RPL18/RPL36AL/RPL12/RPS29/RPL13/RPL34/RPS15/RPL36/RPL3L/RPL28/RPL27A/RPS24/FAU/RPLP2/RPL10L/RPL32
KEGG_LEISHMANIA_INFECTION	KEGG_LEISHMANIA_INFECTION	KEGG_LEISHMANIA_INFECTION	69	-0.6036	-1.95319	1.90542e-05	0.000233731	0.000167142	2287	tags=42%, list=13%, signal=37%	STAT1/HLA-DPA1/NCF2/CYBA/TLR4/JAK2/IL12B/PTPN6/HLA-DOA/FCGR2A/HLA-DRB1/HLA-DMA/HLA-DMB/HLA-DRA/HLA-DQB1/C3/HLA-DPB1/ITGB2/ITGAM/HLA-DQA2/NOS2/PRKCB/FCGR1A/HLA-DRB5/HLA-DQA1/HLA-DOB/FCGR3A/NCF1/IFNG
KEGG_JAK_STAT_SIGNALING_PATHWAY	KEGG_JAK_STAT_SIGNALING_PATHWAY	KEGG_JAK_STAT_SIGNALING_PATHWAY	143	-0.482623	-1.74649	2.65347e-05	0.00030515	0.000218213	2971	tags=35%, list=17%, signal=29%	IL23R/PIK3R3/IL4/IL7/IFNA5/IL15/IL24/IRF9/STAT2/STAT1/IL2RG/JAK2/SOCS1/IFNL3/IL12B/PTPN6/IFNB1/IL9R/IL13/PIK3R2/CSF3R/IL15RA/IFNL1/PIK3R5/IFNA21/GH1/IL22RA2/PIK3CD/LEP/STAT4/IL7R/JAK3/IL10RA/PIK3CG/PRLR/IFNW1/IL5RA/IFNL2/IL2RA/IL12RB1/IL2RB/GH2/IL26/IL22/IL12RB2/IL21/IL2/IFNK/IL21R/IFNG
KEGG_CELL_ADHESION_MOLECULES_CAMS	KEGG_CELL_ADHESION_MOLECULES_CAMS	KEGG_CELL_ADHESION_MOLECULES_CAMS	127	-0.484188	-1.70654	0.000115116	0.00124596	0.000890987	2296	tags=40%, list=13%, signal=35%	VCAM1/HLA-DPA1/ICAM2/HLA-B/CDH4/PDCD1LG2/HLA-E/HLA-A/CDH3/HLA-F/CD40/HLA-DOA/ICOS/CD28/MAG/HLA-DRB1/ITGB7/CD86/HLA-DMA/CTLA4/HLA-DMB/HLA-DRA/CLDN6/PTPRC/HLA-DQB1/CD226/CD40LG/HLA-DPB1/CD4/SPN/CD80/ITGB2/ITGAM/HLA-DQA2/ICAM3/SELL/HLA-DRB5/HLA-G/SIGLEC1/HLA-DQA1/CD6/CLDN11/SELPLG/ITGAL/CD274/HLA-DOB/CD2/PDCD1/CD8B/CD8A/CD22
KEGG_METABOLISM_OF_XENOBIOTICS_BY_CYTOCHROME_P450	KEGG_METABOLISM_OF_XENOBIOTICS_BY_CYTOCHROME_P450	KEGG_METABOLISM_OF_XENOBIOTICS_BY_CYTOCHROME_P450	68	-0.561673	-1.81264	0.00021766	0.00222497	0.00159108	2414	tags=37%, list=14%, signal=32%	GSTZ1/GSTA1/GSTP1/CYP1B1/UGT1A6/UGT1A1/CYP2S1/CYP3A5/ADH4/UGT2A1/UGT1A3/UGT1A7/ADH1A/ALDH3B1/CYP2C9/UGT2B7/GSTA3/ADH6/UGT1A4/UGT2B17/UGT1A5/CYP2B6/ALDH3A1/UGT2B10/CYP1A2
KEGG_HYPERTROPHIC_CARDIOMYOPATHY_HCM	KEGG_HYPERTROPHIC_CARDIOMYOPATHY_HCM	KEGG_HYPERTROPHIC_CARDIOMYOPATHY_HCM	83	0.551863	1.74676	0.000248955	0.00241093	0.00172407	1650	tags=31%, list=10%, signal=28%	CACNA1S/DES/CACNG5/SGCG/ITGB8/ACTC1/SGCA/CACNA2D3/CACNG8/ITGA7/TNNI3/CACNG7/CACNB2/CACNA1C/RYR2/LAMA2/ITGA2/CACNA2D1/TNNC1/SGCD/MYL3/ITGA8/CACNA1D/CACNB4/TPM1/TNNT2
KEGG_CHEMOKINE_SIGNALING_PATHWAY	KEGG_CHEMOKINE_SIGNALING_PATHWAY	KEGG_CHEMOKINE_SIGNALING_PATHWAY	182	-0.432811	-1.61977	0.000271184	0.00249489	0.0017841	1614	tags=31%, list=9%, signal=28%	CCL16/PIK3R3/CCL23/CX3CL1/CXCL13/GNG13/CCL7/RAF1/PREX1/STAT2/STAT1/ELMO1/FGR/JAK2/CXCR2/VAV2/PIK3R2/PTK2B/PLCB2/PIK3R5/GNGT2/HCK/XCL2/PIK3CD/ADCY8/CCL22/CCL26/ITK/JAK3/PIK3CG/RAC2/CCR1/GNG8/CCL13/CCL1/VAV1/DOCK2/PRKCB/CCL3L3/CCR2/CCL4/CCR5/CXCR5/CXCR6/WAS/CXCL10/CCL8/CCL3/CCR3/CCL18/CXCR3/CCL25/NCF1/CCL5/CXCL9/CXCL11
KEGG_DILATED_CARDIOMYOPATHY	KEGG_DILATED_CARDIOMYOPATHY	KEGG_DILATED_CARDIOMYOPATHY	89	0.55291	1.77221	0.000311542	0.0027297	0.00195202	1650	tags=30%, list=10%, signal=28%	CACNA1S/DES/CACNG5/SGCG/ITGB8/ACTC1/SGCA/CACNA2D3/CACNG8/ITGA7/TNNI3/PLN/CACNG7/CACNB2/CACNA1C/RYR2/LAMA2/ITGA2/CACNA2D1/TNNC1/SGCD/MYL3/ITGA8/CACNA1D/CACNB4/TPM1/TNNT2
KEGG_ASTHMA	KEGG_ASTHMA	KEGG_ASTHMA	26	-0.716131	-1.90548	0.000357964	0.00299388	0.00214093	2902	tags=69%, list=17%, signal=58%	IL4/RNASE3/HLA-DPA1/CD40/HLA-DOA/IL13/HLA-DRB1/HLA-DMA/HLA-DMB/HLA-DRA/HLA-DQB1/CD40LG/HLA-DPB1/HLA-DQA2/HLA-DRB5/FCER1G/HLA-DQA1/HLA-DOB
KEGG_TOLL_LIKE_RECEPTOR_SIGNALING_PATHWAY	KEGG_TOLL_LIKE_RECEPTOR_SIGNALING_PATHWAY	KEGG_TOLL_LIKE_RECEPTOR_SIGNALING_PATHWAY	92	-0.507041	-1.69485	0.000563052	0.00450441	0.00322112	2549	tags=29%, list=15%, signal=25%	PIK3R3/IFNA5/LY96/CTSK/STAT1/TLR4/IL12B/IFNB1/CD40/TLR7/PIK3R2/PIK3R5/IRF7/IFNA21/CD86/PIK3CD/CD14/PIK3CG/CD80/TLR8/CCL4/CXCL10/CCL3/SPP1/CCL5/CXCL9/CXCL11
KEGG_ARRHYTHMOGENIC_RIGHT_VENTRICULAR_CARDIOMYOPATHY_ARVC	KEGG_ARRHYTHMOGENIC_RIGHT_VENTRICULAR_CARDIOMYOPATHY_ARVC	KEGG_ARRHYTHMOGENIC_RIGHT_VENTRICULAR_CARDIOMYOPATHY_ARVC	74	0.567424	1.75339	0.000709475	0.00534948	0.00382543	1592	tags=32%, list=9%, signal=30%	CACNA1S/DES/CACNG5/SGCG/ITGB8/SGCA/CACNA2D3/CACNG8/CTNNA3/ITGA7/CACNG7/CACNB2/CACNA1C/GJA1/RYR2/LAMA2/ITGA2/CACNA2D1/SGCD/ITGA8/DSP/CACNA1D/CACNB4/ACTN2
KEGG_TYPE_I_DIABETES_MELLITUS	KEGG_TYPE_I_DIABETES_MELLITUS	KEGG_TYPE_I_DIABETES_MELLITUS	41	-0.608993	-1.8026	0.000726832	0.00534948	0.00382543	2267	tags=66%, list=13%, signal=57%	HLA-DPA1/HLA-B/HLA-E/HLA-A/IL12B/HLA-F/HLA-DOA/CD28/HLA-DRB1/CD86/HLA-DMA/HLA-DMB/HLA-DRA/HLA-DQB1/HLA-DPB1/PRF1/CD80/HLA-DQA2/HLA-DRB5/HLA-G/HLA-DQA1/LTA/GZMB/HLA-DOB/FASLG/IL2/IFNG
KEGG_CARDIAC_MUSCLE_CONTRACTION	KEGG_CARDIAC_MUSCLE_CONTRACTION	KEGG_CARDIAC_MUSCLE_CONTRACTION	73	0.551416	1.69659	0.0013319	0.00942573	0.00674037	1650	tags=30%, list=10%, signal=27%	ATP1A2/CACNA1S/CACNG5/ACTC1/ATP1A3/CACNA2D3/COX6A2/CACNG8/TNNI3/CACNG7/COX7B2/CACNB2/CACNA1C/RYR2/CACNA2D1/ATP1B2/TNNC1/MYL3/CACNA1D/CACNB4/TPM1/TNNT2
KEGG_CALCIUM_SIGNALING_PATHWAY	KEGG_CALCIUM_SIGNALING_PATHWAY	KEGG_CALCIUM_SIGNALING_PATHWAY	176	0.435798	1.53317	0.00164683	0.0112229	0.0080255	2284	tags=30%, list=13%, signal=26%	NTSR1/CALML5/TACR3/TACR2/CACNA1S/P2RX1/ADRB3/CCKBR/ATP2B3/CACNA1B/EGFR/ATP2B2/CACNA1H/CACNA1G/MYLK/CHRM2/PDE1C/PLN/HTR2C/SLC8A2/CACNA1C/GRIN2A/HTR5A/GRIN1/CHRM3/NOS1/GNAL/CYSLTR1/DRD1/ERBB2/RYR2/CHRM1/CALML3/TNNC2/TNNC1/P2RX3/CACNA1E/HTR7/ATP2B4/CACNA1D/CACNA1I/CAMK2D/MYLK3/GRIN2C/SLC8A3/PLCB1/CAMK4/EDNRA/ERBB4/PHKG1/PRKACB/PTGER1
KEGG_PROTEASOME	KEGG_PROTEASOME	KEGG_PROTEASOME	43	-0.581133	-1.72685	0.00261213	0.0171654	0.0122751	4780	tags=60%, list=28%, signal=44%	PSMA7/PSMC5/PSMB2/PSMC3/PSMA6/PSMC6/PSMD13/PSMB5/PSMB7/PSMA3/PSMA5/PSMA1/PSMB1/PSMD3/PSMD4/PSMB4/PSMB3/PSMB6/PSMB8/PSME1/PSMB10/PSME2/PSMB9/PSMB11/PSMA8/IFNG
KEGG_PPAR_SIGNALING_PATHWAY	KEGG_PPAR_SIGNALING_PATHWAY	KEGG_PPAR_SIGNALING_PATHWAY	68	-0.506078	-1.63322	0.00325049	0.0206238	0.0147481	2612	tags=34%, list=15%, signal=29%	PPARG/CPT1B/APOA5/ANGPTL4/ACSL6/PCK2/LPL/FABP6/CD36/FABP4/SLC27A5/FABP1/NR1H3/CYP4A22/PLIN1/CYP4A11/FABP7/UCP1/APOA1/MMP1/ADIPOQ/APOC3/APOA2
KEGG_DRUG_METABOLISM_CYTOCHROME_P450	KEGG_DRUG_METABOLISM_CYTOCHROME_P450	KEGG_DRUG_METABOLISM_CYTOCHROME_P450	70	-0.504992	-1.63843	0.00344163	0.0211086	0.0150949	1615	tags=37%, list=9%, signal=34%	GSTZ1/GSTA1/GSTP1/UGT1A6/UGT1A1/CYP3A5/ADH4/CYP2D6/UGT2A1/UGT1A3/UGT1A7/ADH1A/FMO1/ALDH3B1/CYP2C9/UGT2B7/GSTA3/ADH6/FMO3/UGT1A4/UGT2B17/UGT1A5/CYP2B6/ALDH3A1/UGT2B10/CYP1A2
KEGG_PHENYLALANINE_METABOLISM	KEGG_PHENYLALANINE_METABOLISM	KEGG_PHENYLALANINE_METABOLISM	17	-0.71701	-1.73335	0.00364335	0.021625	0.0154641	2189	tags=41%, list=13%, signal=36%	MIF/IL4I1/HPD/ALDH3B1/TAT/PAH/ALDH3A1
KEGG_TRYPTOPHAN_METABOLISM	KEGG_TRYPTOPHAN_METABOLISM	KEGG_TRYPTOPHAN_METABOLISM	39	-0.579183	-1.69705	0.00420858	0.0241993	0.017305	3071	tags=26%, list=18%, signal=21%	ACAT1/OGDHL/ECHS1/ALDH3A2/IL4I1/CYP1B1/KMO/TPH2/IDO1/CYP1A2
KEGG_PEROXISOME	KEGG_PEROXISOME	KEGG_PEROXISOME	78	-0.466783	-1.54259	0.00576779	0.0321598	0.0229976	2862	tags=23%, list=16%, signal=19%	SLC27A2/PEX16/CRAT/ACSL6/PAOX/ECI2/PEX11G/DDO/PRDX5/ABCD2/EPHX2/PECR/AGXT/NOS2/HAO2/DAO/HAO1/BAAT
KEGG_CYSTEINE_AND_METHIONINE_METABOLISM	KEGG_CYSTEINE_AND_METHIONINE_METABOLISM	KEGG_CYSTEINE_AND_METHIONINE_METABOLISM	34	-0.569882	-1.63378	0.00644258	0.0348657	0.0249326	2498	tags=21%, list=14%, signal=18%	LDHAL6B/DNMT3B/IL4I1/TAT/CBS/DNMT3L/MAT1A
KEGG_PORPHYRIN_AND_CHLOROPHYLL_METABOLISM	KEGG_PORPHYRIN_AND_CHLOROPHYLL_METABOLISM	KEGG_PORPHYRIN_AND_CHLOROPHYLL_METABOLISM	40	-0.558407	-1.64663	0.00677375	0.0356106	0.0254652	2100	tags=52%, list=12%, signal=46%	UGT1A9/COX10/MMAB/COX15/UROS/UROD/BLVRA/PPOX/CP/UGT1A6/UGT1A1/UGT2A1/UGT1A3/UGT1A7/HMOX1/FTMT/UGT2B7/UGT1A4/UGT2B17/UGT1A5/UGT2B10
KEGG_RETINOL_METABOLISM	KEGG_RETINOL_METABOLISM	KEGG_RETINOL_METABOLISM	64	-0.483611	-1.55416	0.00794216	0.0395999	0.028318	1985	tags=38%, list=11%, signal=33%	UGT1A6/RDH16/UGT1A1/RDH10/RPE65/DHRS3/CYP3A5/ADH4/UGT2A1/UGT1A3/UGT1A7/ADH1A/CYP4A22/CYP2C9/CYP4A11/UGT2B7/ADH6/UGT1A4/UGT2B17/UGT1A5/CYP2B6/ALDH1A1/UGT2B10/CYP1A2
KEGG_OLFACTORY_TRANSDUCTION	KEGG_OLFACTORY_TRANSDUCTION	KEGG_OLFACTORY_TRANSDUCTION	135	-0.405871	-1.45058	0.00796303	0.0395999	0.028318	2359	tags=33%, list=14%, signal=29%	OR6C2/OR52E6/OR10AD1/OR4C6/CNGB1/OR10H1/OR52N5/OR9A4/OR52W1/OR8D1/OR51B4/OR11A1/OR2A42/GUCA1A/OR10G2/CAMK2B/CNGA4/OR2W3/OR52I1/OR52B2/OR1J1/OR13A1/OR10H2/OR2C1/OR2A14/OR10A2/OR51M1/OR6A2/OR52N4/GUCY2D/OR2K2/OR1L8/OR52N1/OR2H1/OR10Q1/OR51Q1/OR2B2/OR52D1/OR51B2/OR51B5/OR2T8/OR51I1/OR13H1/OR3A2/OR52E8
KEGG_TASTE_TRANSDUCTION	KEGG_TASTE_TRANSDUCTION	KEGG_TASTE_TRANSDUCTION	46	-0.540621	-1.62881	0.0105743	0.0512019	0.0366146	2654	tags=46%, list=15%, signal=39%	TAS2R5/GNG13/SCNN1G/ASIC2/TAS2R19/TAS2R20/TAS2R4/TAS2R46/TAS2R31/GRM4/PLCB2/ADCY8/TAS2R42/TAS2R8/TAS2R10/TAS2R13/TAS2R43/TAS1R2/TAS2R50/TAS2R3/GNAT3
KEGG_TYROSINE_METABOLISM	KEGG_TYROSINE_METABOLISM	KEGG_TYROSINE_METABOLISM	40	-0.54413	-1.60453	0.0113588	0.0524776	0.0375269	2414	tags=32%, list=14%, signal=28%	GSTZ1/TYR/MIF/IL4I1/HGD/ADH4/DBH/HPD/ADH1A/ALDH3B1/TAT/ADH6/ALDH3A1
KEGG_ASCORBATE_AND_ALDARATE_METABOLISM	KEGG_ASCORBATE_AND_ALDARATE_METABOLISM	KEGG_ASCORBATE_AND_ALDARATE_METABOLISM	25	-0.62115	-1.6283	0.0114082	0.0524776	0.0375269	1985	tags=44%, list=11%, signal=39%	UGT1A6/UGT1A1/MIOX/UGT2A1/UGT1A3/UGT1A7/UGT2B7/UGT1A4/UGT2B17/UGT1A5/UGT2B10
KEGG_MAPK_SIGNALING_PATHWAY	KEGG_MAPK_SIGNALING_PATHWAY	KEGG_MAPK_SIGNALING_PATHWAY	263	0.362493	1.32737	0.013981	0.0627438	0.0448683	1834	tags=18%, list=11%, signal=16%	FGF4/CACNA1S/FGF3/CACNG5/PLA2G2A/NR4A1/FGF23/BDNF/CACNA1B/EGFR/IL1A/PTPRR/CACNA1H/CACNA2D3/CACNA1G/CACNG8/FLNC/DUSP8/CACNG7/CACNB2/FGF10/CACNA1C/HSPA6/MAPK8IP2/FGF22/FGF7/PLA2G12B/FGF13/FGF20/DUSP10/FGFR4/CACNA2D1/FGFR3/PLA2G5/CACNA1E/CACNA1D/CACNB4/RPS6KA6/FGF12/CACNA1I/AKT3/FGF8/NTRK1/FGF9/IL1B/FGF18/FLNA
KEGG_DNA_REPLICATION	KEGG_DNA_REPLICATION	KEGG_DNA_REPLICATION	36	-0.563226	-1.6093	0.0149681	0.0655746	0.0468926	6560	tags=64%, list=38%, signal=40%	RNASEH1/RPA2/POLE/SSBP1/MCM6/RNASEH2A/DNA2/POLD3/RNASEH2B/POLA1/POLD1/FEN1/RFC5/PRIM1/PRIM2/POLE2/MCM5/POLA2/RFC4/MCM3/POLD4/RPA4/RNASEH2C
KEGG_PENTOSE_AND_GLUCURONATE_INTERCONVERSIONS	KEGG_PENTOSE_AND_GLUCURONATE_INTERCONVERSIONS	KEGG_PENTOSE_AND_GLUCURONATE_INTERCONVERSIONS	28	-0.58836	-1.57555	0.0163337	0.0685979	0.0490545	1985	tags=36%, list=11%, signal=32%	UGT1A6/UGT1A1/UGT2A1/UGT1A3/UGT1A7/UGT2B7/UGT1A4/UGT2B17/UGT1A5/UGT2B10
KEGG_FOLATE_BIOSYNTHESIS	KEGG_FOLATE_BIOSYNTHESIS	KEGG_FOLATE_BIOSYNTHESIS	10	-0.732826	-1.54794	0.0169396	0.0685979	0.0490545	231	tags=50%, list=1%, signal=49%	SPR/FPGS/GCH1/ALPI/ALPP
KEGG_STARCH_AND_SUCROSE_METABOLISM	KEGG_STARCH_AND_SUCROSE_METABOLISM	KEGG_STARCH_AND_SUCROSE_METABOLISM	48	-0.487673	-1.47599	0.0170163	0.0685979	0.0490545	2240	tags=35%, list=13%, signal=31%	G6PC2/GAA/UGT1A6/UGT1A1/GYS2/HK3/UGT2A1/UGT1A3/AMY2B/ENPP1/UGT1A7/UGT2B7/TREH/UGT1A4/UGT2B17/UGT1A5/UGT2B10
KEGG_CYTOSOLIC_DNA_SENSING_PATHWAY	KEGG_CYTOSOLIC_DNA_SENSING_PATHWAY	KEGG_CYTOSOLIC_DNA_SENSING_PATHWAY	42	-0.519867	-1.54216	0.0171495	0.0685979	0.0490545	2873	tags=36%, list=17%, signal=30%	POLR3A/NFKBIA/RIPK3/IL18/IFNA5/CASP1/IFNB1/PYCARD/IRF7/IFNA21/AIM2/CCL4/CXCL10/ZBP1/CCL5
KEGG_FC_EPSILON_RI_SIGNALING_PATHWAY	KEGG_FC_EPSILON_RI_SIGNALING_PATHWAY	KEGG_FC_EPSILON_RI_SIGNALING_PATHWAY	78	-0.439275	-1.45169	0.0180442	0.0706409	0.0505155	2911	tags=32%, list=17%, signal=27%	PIK3R3/IL4/PLA2G2C/RAF1/PLA2G2E/RAC3/PLA2G2F/PLA2G1B/LAT/IL13/VAV2/PIK3R2/PLCG2/PIK3R5/PIK3CD/PIK3CG/RAC2/PLA2G2D/LCP2/VAV1/PRKCB/PLA2G3/FCER1G/BTK/PLA2G10
KEGG_SELENOAMINO_ACID_METABOLISM	KEGG_SELENOAMINO_ACID_METABOLISM	KEGG_SELENOAMINO_ACID_METABOLISM	24	-0.596566	-1.55037	0.0225853	0.0865771	0.0619115	401	tags=12%, list=2%, signal=12%	GGT5/CBS/MAT1A
KEGG_VIRAL_MYOCARDITIS	KEGG_VIRAL_MYOCARDITIS	KEGG_VIRAL_MYOCARDITIS	68	-0.451117	-1.45585	0.0232451	0.0872879	0.0624198	2283	tags=41%, list=13%, signal=36%	MYH4/HLA-DPA1/HLA-B/RAC3/HLA-E/HLA-A/HLA-F/CD40/HLA-DOA/CD28/HLA-DRB1/CD86/HLA-DMA/HLA-DMB/HLA-DRA/RAC2/HLA-DQB1/CD40LG/HLA-DPB1/PRF1/CD80/ITGB2/HLA-DQA2/HLA-DRB5/HLA-G/HLA-DQA1/ITGAL/HLA-DOB
KEGG_DRUG_METABOLISM_OTHER_ENZYMES	KEGG_DRUG_METABOLISM_OTHER_ENZYMES	KEGG_DRUG_METABOLISM_OTHER_ENZYMES	51	-0.459921	-1.40147	0.0270929	0.0980927	0.0701464	1985	tags=33%, list=11%, signal=30%	UGT1A6/UGT1A1/UPP1/CYP3A5/UGT2A1/UGT1A3/TYMP/UPB1/CES1/UGT1A7/CDA/DPYS/UGT2B7/UGT1A4/UGT2B17/UGT1A5/UGT2B10
KEGG_MATURITY_ONSET_DIABETES_OF_THE_YOUNG	KEGG_MATURITY_ONSET_DIABETES_OF_THE_YOUNG	KEGG_MATURITY_ONSET_DIABETES_OF_THE_YOUNG	25	0.60137	1.51813	0.0271887	0.0980927	0.0701464	1305	tags=36%, list=8%, signal=33%	NEUROD1/FOXA2/HNF4A/HNF1A/NKX6-1/ONECUT1/GCK/PDX1/FOXA3
KEGG_TGF_BETA_SIGNALING_PATHWAY	KEGG_TGF_BETA_SIGNALING_PATHWAY	KEGG_TGF_BETA_SIGNALING_PATHWAY	85	0.440162	1.3975	0.0303242	0.107301	0.0767313	3758	tags=36%, list=22%, signal=29%	LEFTY1/LEFTY2/THBS4/SMAD9/BMP2/NODAL/BMP5/ID4/CHRD/CDKN2B/SMAD6/LTBP1/BMPR1B/ACVR1C/ACVR2A/PITX2/SMAD1/INHBA/GDF7/GDF5/TGFB3/BMPR2/SMURF1/ZFYVE9/ACVR1/ACVR2B/BMP4/INHBB/PPP2CB/TGFBR2/MYC
KEGG_LINOLEIC_ACID_METABOLISM	KEGG_LINOLEIC_ACID_METABOLISM	KEGG_LINOLEIC_ACID_METABOLISM	29	-0.542175	-1.48075	0.031155	0.108161	0.077346	2616	tags=41%, list=15%, signal=35%	CYP3A43/PLA2G2C/PLA2G2E/PLA2G2F/PLA2G1B/CYP3A5/PLA2G2D/CYP2C9/PLA2G3/PLA2G10/AKR1B10/CYP1A2
KEGG_BASE_EXCISION_REPAIR	KEGG_BASE_EXCISION_REPAIR	KEGG_BASE_EXCISION_REPAIR	33	-0.528496	-1.50615	0.0325495	0.110909	0.0793115	6608	tags=67%, list=38%, signal=41%	APEX1/MBD4/MPG/POLE/PARP1/PARP3/UNG/POLD3/NEIL2/POLD1/FEN1/POLE2/MUTYH/PARP2/NTHL1/POLL/POLB/POLD4/NEIL3/SMUG1/NEIL1/OGG1
KEGG_VEGF_SIGNALING_PATHWAY	KEGG_VEGF_SIGNALING_PATHWAY	KEGG_VEGF_SIGNALING_PATHWAY	76	-0.424299	-1.40065	0.036645	0.122594	0.0876676	3738	tags=39%, list=22%, signal=31%	MAP2K2/PLA2G4E/HRAS/CHP2/SHC2/PXN/PIK3R3/PLA2G2C/RAF1/BAD/PLA2G2E/NFATC2/RAC3/PLA2G2F/SPHK1/PLA2G1B/PRKCG/PIK3R2/PLCG2/NFATC1/PIK3R5/PIK3CD/SH2D2A/PIK3CG/RAC2/PLA2G2D/PRKCB/PLA2G3/PLA2G10/PPP3R2
KEGG_GLYCOLYSIS_GLUCONEOGENESIS	KEGG_GLYCOLYSIS_GLUCONEOGENESIS	KEGG_GLYCOLYSIS_GLUCONEOGENESIS	60	-0.43609	-1.37837	0.0407547	0.133908	0.0957581	2566	tags=25%, list=15%, signal=21%	ALDH3A2/LDHAL6B/PCK2/G6PC2/FBP1/HK3/ADH4/ENO3/PKLR/ADH1A/ALDH3B1/ADH6/ALDOB/FBP2/ALDH3A1
KEGG_FC_GAMMA_R_MEDIATED_PHAGOCYTOSIS	KEGG_FC_GAMMA_R_MEDIATED_PHAGOCYTOSIS	KEGG_FC_GAMMA_R_MEDIATED_PHAGOCYTOSIS	92	-0.40544	-1.35524	0.0416994	0.134609	0.096259	1957	tags=24%, list=11%, signal=21%	RAF1/ARPC4/SPHK1/LAT/VAV2/PRKCG/PIK3R2/PLCG2/FCGR2A/PIK3R5/HCK/PIK3CD/PTPRC/PIK3CG/RAC2/VAV1/DOCK2/PRKCB/FCGR1A/WAS/FCGR3A/NCF1
KEGG_GAP_JUNCTION	KEGG_GAP_JUNCTION	KEGG_GAP_JUNCTION	86	0.430929	1.37277	0.0469799	0.147058	0.105162	2251	tags=17%, list=13%, signal=15%	TUBA3C/TUBA3E/GJD2/TUBB2B/DRD2/EGFR/HTR2C/TUBB4A/GJA1/DRD1/TUBA1A/TUBB3/PLCB1/PRKACB/PRKG2
KEGG_TIGHT_JUNCTION	KEGG_TIGHT_JUNCTION	KEGG_TIGHT_JUNCTION	126	0.398773	1.34874	0.0471545	0.147058	0.105162	3851	tags=34%, list=22%, signal=27%	CLDN3/MYH11/CLDN19/MYH8/CTNNA3/MYL10/MYH1/CLDN1/IGSF5/ACTN2/MAGI1/AKT3/MYH2/RAB3B/CLDN18/MYL9/OCLN/PRKCI/CLDN16/MAGI3/CLDN9/CLDN4/MYH7B/ACTN4/AKT2/GNAI1/CGN/AMOTL1/MAGI2/EPB41/PPP2R2B/TJP1/CDK4/MYH13/CTNNA2/MRAS/PPP2CB/CLDN23/CTNNB1/NRAS/MYH7/CLDN15/PARD6B

## Sheet: Table S4
Supplementary Table 4: GSEA for high and low expression set of NCAM1 in TCGA-BLCA
	ID	Description	setSize	enrichmentScore	NES	pvalue	p.adjust	qvalue	rank	leading_edge	core_enrichment
KEGG_CELL_ADHESION_MOLECULES_CAMS	KEGG_CELL_ADHESION_MOLECULES_CAMS	KEGG_CELL_ADHESION_MOLECULES_CAMS	127	0.660207	2.05056	3.23e-09	5.94e-07	5.2e-07	2874	tags=53%, list=16%, signal=45%	CLDN3/CD8B/CD22/SELL/CLDN6/ICAM3/CLDN8/NRXN1/SELE/CDH4/CD8A/ICAM1/NCAM1/CD40/CD6/PTPRC/HLA-G/SPN/HLA-DQA2/CD40LG/ITGAL/HLA-DQB1/PDCD1/ITGB2/CNTNAP2/VCAM1/ITGAM/CD2/CD80/CDH15/CADM1/HLA-DPA1/SELPLG/CLDN17/ICAM2/HLA-DMB/ALCAM/CLDN10/ICOS/ITGA4/CTLA4/HLA-DOB/HLA-DRA/HLA-DRB1/HLA-DQA1/CLDN19/CD274/HLA-DOA/CD4/PDCD1LG2/CLDN9/HLA-DPB1/CD28/CLDN14/CLDN23/NRCAM/MADCAM1/CNTNAP1/CNTN2/HLA-DRB5/CLDN15/HLA-D…
KEGG_PRIMARY_IMMUNODEFICIENCY	KEGG_PRIMARY_IMMUNODEFICIENCY	KEGG_PRIMARY_IMMUNODEFICIENCY	35	0.780367	2.00644	1.03e-06	9.52e-05	8.33e-05	2691	tags=66%, list=15%, signal=56%	CD8B/IGLL1/CD79A/AICDA/TNFRSF13B/CD19/AIRE/ZAP70/BTK/IL2RG/CD8A/CD40/CD3E/PTPRC/LCK/CD40LG/CD3D/ICOS/JAK3/CD4/IL7R/TNFRSF13C/CIITA
KEGG_CYTOKINE_CYTOKINE_RECEPTOR_INTERACTION	KEGG_CYTOKINE_CYTOKINE_RECEPTOR_INTERACTION	KEGG_CYTOKINE_CYTOKINE_RECEPTOR_INTERACTION	260	0.51161	1.66763	2.24e-06	0.000137615	0.000120453	3141	tags=39%, list=17%, signal=33%	IFNK/CCL1/TNFRSF17/EPO/GH1/TNFRSF11B/TNFRSF13B/CSF3/CCL16/TNFSF18/IL22/CXCL10/LTA/NGFR/CD27/IL21R/CCL19/IFNG/IL13/CXCL13/CXCL11/INHBE/CCL5/CCL14/CSF2RA/IL12RB1/IL2RG/TNFRSF9/IL2/CSF2RB/CCL21/CCL3L3/CXCL3/IL4/CXCR5/CXCL14/IL12A/XCL1/TNF/GH2/TNFSF4/CD40/XCR1/CCL25/CXCR4/KITLG/LTB/EDA/CCR6/TNFRSF4/CCL3/IL5RA/CCR8/TNFRSF19/CCL4/CD40LG/CXCR3/CCL11/CXCL16/TNFSF8/IL12B/CCL2/FLT4/TNFSF15/AMH/OSM/GDF5/CCL…
KEGG_ALLOGRAFT_REJECTION	KEGG_ALLOGRAFT_REJECTION	KEGG_ALLOGRAFT_REJECTION	35	0.758844	1.95111	5.36e-06	0.000246702	0.000215935	2544	tags=74%, list=14%, signal=64%	PRF1/IFNG/GZMB/IL2/IL4/IL12A/TNF/CD40/HLA-G/HLA-DQA2/CD40LG/HLA-DQB1/CD80/HLA-DPA1/IL12B/HLA-DMB/HLA-DOB/HLA-DRA/HLA-DRB1/HLA-DQA1/FASLG/HLA-DOA/HLA-DPB1/CD28/HLA-DRB5/HLA-DMA
KEGG_PPAR_SIGNALING_PATHWAY	KEGG_PPAR_SIGNALING_PATHWAY	KEGG_PPAR_SIGNALING_PATHWAY	69	-0.581733	-1.98753	2.81e-05	0.0010345	0.000905484	794	tags=22%, list=4%, signal=21%	APOA5/FABP2/ACSL5/CYP8B1/HMGCS2/CD36/ANGPTL4/CYP4A22/LPL/PLIN1/FABP4/APOA2/UCP1/ADIPOQ/FABP7
KEGG_HEMATOPOIETIC_CELL_LINEAGE	KEGG_HEMATOPOIETIC_CELL_LINEAGE	KEGG_HEMATOPOIETIC_CELL_LINEAGE	84	0.601619	1.78254	6.14e-05	0.00188444	0.00164943	3458	tags=62%, list=19%, signal=50%	MS4A1/FCER2/CR2/CD8B/CD22/EPO/CSF3/CD37/CD19/CSF2RA/IL4/CD8A/TNF/CD3E/KITLG/CR1/IL5RA/ITGAM/CD2/GP5/CD3D/ITGA4/CD1D/HLA-DRA/HLA-DRB1/CD3G/ITGB3/GP1BA/CD7/CD4/CD1C/CD1E/CD55/CD5/IL6/DNTT/CSF1/IL7R/CD38/IL3RA/HLA-DRB5/CD33/CD44/MME/IL1R2/IL11RA/CSF3R/ITGA5/ITGA2B/CD34/GYPA/CD1A
KEGG_VIRAL_MYOCARDITIS	KEGG_VIRAL_MYOCARDITIS	KEGG_VIRAL_MYOCARDITIS	68	0.623658	1.78349	0.000144294	0.00379286	0.00331984	3400	tags=51%, list=19%, signal=42%	PRF1/ICAM1/MYH7/CD40/MYH7B/HLA-G/HLA-DQA2/CD40LG/ITGAL/HLA-DQB1/ITGB2/CD80/HLA-DPA1/RAC2/HLA-DMB/HLA-DOB/HLA-DRA/MYH3/HLA-DRB1/HLA-DQA1/HLA-DOA/MYH8/HLA-DPB1/CD28/CD55/DMD/HLA-DRB5/HLA-DMA/FYN/MYH10/LAMA2/SGCG/MYH2/SGCB/SGCA
KEGG_INTESTINAL_IMMUNE_NETWORK_FOR_IGA_PRODUCTION	KEGG_INTESTINAL_IMMUNE_NETWORK_FOR_IGA_PRODUCTION	KEGG_INTESTINAL_IMMUNE_NETWORK_FOR_IGA_PRODUCTION	46	0.65947	1.77755	0.000474767	0.00992778	0.00868965	2671	tags=67%, list=15%, signal=58%	TNFRSF17/AICDA/TNFRSF13B/IL2/IL4/CD40/CCL25/CXCR4/HLA-DQA2/CD40LG/HLA-DQB1/CD80/HLA-DPA1/HLA-DMB/ICOS/ITGA4/HLA-DOB/HLA-DRA/HLA-DRB1/HLA-DQA1/HLA-DOA/IL15RA/HLA-DPB1/CD28/IL6/MADCAM1/IL15/TNFRSF13C/HLA-DRB5/HLA-DMA/ITGB7
KEGG_GRAFT_VERSUS_HOST_DISEASE	KEGG_GRAFT_VERSUS_HOST_DISEASE	KEGG_GRAFT_VERSUS_HOST_DISEASE	37	0.687663	1.78751	0.000485598	0.00992778	0.00868965	2554	tags=68%, list=14%, signal=58%	PRF1/IFNG/GZMB/IL2/KIR3DL2/TNF/HLA-G/HLA-DQA2/HLA-DQB1/CD80/HLA-DPA1/HLA-DMB/HLA-DOB/HLA-DRA/HLA-DRB1/HLA-DQA1/FASLG/KLRD1/HLA-DOA/HLA-DPB1/CD28/IL6/HLA-DRB5/HLA-DMA/KIR3DL1
KEGG_SYSTEMIC_LUPUS_ERYTHEMATOSUS	KEGG_SYSTEMIC_LUPUS_ERYTHEMATOSUS	KEGG_SYSTEMIC_LUPUS_ERYTHEMATOSUS	54	0.63058	1.73883	0.00059063	0.0103338	0.00904502	3037	tags=54%, list=17%, signal=45%	ACTN2/IFNG/ACTN3/FCGR2B/TNF/CD40/C9/GRIN2B/HLA-DQA2/C4A/CD40LG/HLA-DQB1/CD80/HLA-DPA1/HLA-DMB/HLA-DOB/HLA-DRA/HLA-DRB1/HLA-DQA1/HLA-DOA/C4B/HLA-DPB1/CTSG/CD28/C2/HLA-DRB5/HLA-DMA/C1S/FCGR3A
KEGG_CHEMOKINE_SIGNALING_PATHWAY	KEGG_CHEMOKINE_SIGNALING_PATHWAY	KEGG_CHEMOKINE_SIGNALING_PATHWAY	184	0.486313	1.55203	0.000617781	0.0103338	0.00904502	4270	tags=40%, list=24%, signal=31%	CCL1/NCF1/CCL16/CXCL10/CCL19/CXCL13/CXCL11/CCL5/CCL14/CCL21/CCL3L3/CXCL3/WAS/CXCR5/CXCL14/RASGRP2/XCL1/GRK5/GNG7/XCR1/CCL25/CXCR4/VAV1/CCR6/CCL3/CCR8/CCL4/CXCR3/CCL11/CXCL16/DOCK2/PIK3CD/RAC2/ITK/CCL2/CCL18/CCL7/ELMO1/PRKCB/JAK3/PREX1/CX3CL1/CCR5/HCK/PLCB2/CCR4/GNG2/AKT3/CXCL9/CCL15/GNGT2/CCR2/PIK3CG/CCL27/GRK7/CCR3/ADCY4/JAK2/CSK/CCR7/PIK3R5/GRK1/GNG11/ADCY9/PAK1/SHC4/CCL23/PRKX/CXCR6/PTK2B/ARRB…
KEGG_LEUKOCYTE_TRANSENDOTHELIAL_MIGRATION	KEGG_LEUKOCYTE_TRANSENDOTHELIAL_MIGRATION	KEGG_LEUKOCYTE_TRANSENDOTHELIAL_MIGRATION	113	0.52787	1.6171	0.000974033	0.0149352	0.0130725	4372	tags=46%, list=24%, signal=35%	CLDN3/CLDN6/ACTN2/NCF1/RHOH/MMP9/CLDN8/ACTN3/MYL10/ICAM1/CXCR4/VAV1/ITGAL/ITGB2/VCAM1/PLCG2/ITGAM/CLDN17/PIK3CD/RAC2/ITK/CLDN10/ITGA4/CLDN19/PRKCB/NCF4/CLDN9/PRKCG/CLDN14/CLDN23/CLDN15/CDH5/ESAM/PIK3CG/MSN/JAM2/CLDN18/MAPK12/NCF2/PIK3R5/CD99/PECAM1/SIPA1/CLDN16/MYL5/NOX3/PTK2B/CLDN20/CLDN1/NOX1/MYL9/MYL2
KEGG_MELANOMA	KEGG_MELANOMA	KEGG_MELANOMA	71	0.559121	1.60869	0.00301002	0.0426034	0.0372902	3707	tags=39%, list=21%, signal=31%	FGF4/FGF3/FGF20/FGF23/FGF22/FGF21/FGF18/FGF10/FGF5/FGF17/FGF7/FGFR1/FGF1/PIK3CD/FGF8/AKT3/PDGFRB/HGF/FGF11/PIK3CG/FGF2/EGF/FGF9/PDGFA/MDM2/PDGFC/PIK3R5/FGF14
KEGG_LEISHMANIA_INFECTION	KEGG_LEISHMANIA_INFECTION	KEGG_LEISHMANIA_INFECTION	69	0.542874	1.55457	0.0037181	0.0488665	0.0427721	3522	tags=42%, list=20%, signal=34%	NCF1/IFNG/IL4/IL12A/TNF/HLA-DQA2/CR1/HLA-DQB1/ITGB2/ITGAM/HLA-DPA1/IL12B/HLA-DMB/ITGA4/HLA-DOB/HLA-DRA/HLA-DRB1/HLA-DQA1/PRKCB/HLA-DOA/NCF4/HLA-DPB1/HLA-DRB5/HLA-DMA/FCGR3A/FCGR2A/MAPK12/JAK2/NCF2
KEGG_REGULATION_OF_ACTIN_CYTOSKELETON	KEGG_REGULATION_OF_ACTIN_CYTOSKELETON	KEGG_REGULATION_OF_ACTIN_CYTOSKELETON	210	0.445361	1.43147	0.00445455	0.0536124	0.0469262	2922	tags=23%, list=16%, signal=20%	FGF4/FGF3/FGF20/INSRR/ACTN2/FGF23/FGF22/ITGA11/FGF21/PIP5K1B/ACTN3/ITGAD/ITGA10/MYL10/FGF18/FGF10/BDKRB1/WAS/NCKAP1L/FGF5/ITGAX/VAV1/FGF17/FGF7/ITGAL/ITGB2/SCIN/ITGAM/FGFR1/FGF1/PIK3CD/RAC2/ITGA4/PIP4K2A/CHRM2/ITGB3/BDKRB2/F2R/FGF8/PFN4/PFN3/PDGFRB/ITGB7/FGF11/CHRM5/PIK3CG/FGFR4/FGF2/MYH10
KEGG_ASTHMA	KEGG_ASTHMA	KEGG_ASTHMA	28	0.68041	1.68518	0.00466195	0.0536124	0.0469262	2846	tags=71%, list=16%, signal=60%	IL13/IL4/TNF/CD40/HLA-DQA2/CD40LG/HLA-DQB1/HLA-DPA1/CCL11/HLA-DMB/HLA-DOB/HLA-DRA/HLA-DRB1/HLA-DQA1/HLA-DOA/HLA-DPB1/RNASE3/HLA-DRB5/HLA-DMA/FCER1G
KEGG_NEUROACTIVE_LIGAND_RECEPTOR_INTERACTION	KEGG_NEUROACTIVE_LIGAND_RECEPTOR_INTERACTION	KEGG_NEUROACTIVE_LIGAND_RECEPTOR_INTERACTION	271	0.413907	1.3576	0.00751595	0.0779184	0.0682009	3076	tags=41%, list=17%, signal=34%	RXFP2/GHRHR/GRID2/GABRP/CCKAR/HTR1E/UTS2R/NPFFR2/CNR2/SSTR4/SSTR2/NTSR1/F2RL2/GH1/P2RY8/GABRB1/NMUR2/SSTR3/OPRM1/HTR1F/ADRA1D/ADRA2B/NPY4R/GPR83/MCHR1/OPRK1/GCGR/CCKBR/P2RY10/VIPR2/GRM7/CHRNA6/SCTR/CRHR1/LPAR4/BDKRB1/GRPR/TACR3/GH2/GRM4/NPY1R/CYSLTR2/HTR4/GRIN2B/CHRNE/GABRA3/ADCYAP1R1/ADORA1/NPFFR1/CHRNA7/GABRR1/GRIK4/TBXA2R/AVPR1B/GABRG3/CNR1/P2RX1/CHRND/MTNR1B/EDNRB/DRD2/HTR5A/AVPR2/CHRM2/PTGER…
KEGG_OLFACTORY_TRANSDUCTION	KEGG_OLFACTORY_TRANSDUCTION	KEGG_OLFACTORY_TRANSDUCTION	369	-0.303428	-1.26502	0.00789137	0.0779184	0.0682009	1798	tags=16%, list=10%, signal=15%	OR2J3/OR13G1/OR2B6/OR52N5/OR51E1/OR56A5/OR6A2/OR1C1/OR5V1/OR4K14/OR2D3/OR2AG2/OR2AK2/OR52N2/OR1Q1/OR10A4/OR52I1/OR52W1/OR52B2/OR51M1/OR14I1/PRKG2/OR5C1/OR6V1/OR5AC2/OR8D1/OR10H5/OR51I2/OR8B8/OR4D10/OR51B5/OR2A2/OR2K2/OR52L1/OR6C2/OR8G5/OR1L6/OR1L3/OR8G1/OR2C3/OR5M10/OR13H1/CLCA4/OR1N1/OR10A2/OR52D1/OR5P2/OR52E6/OR1L4/OR2B2/OR1L8/OR1J4/OR2A12/OR2A14/OR1J2/OR52E8/OR1J1/OR51Q1/CLCA1
KEGG_T_CELL_RECEPTOR_SIGNALING_PATHWAY	KEGG_T_CELL_RECEPTOR_SIGNALING_PATHWAY	KEGG_T_CELL_RECEPTOR_SIGNALING_PATHWAY	107	0.491338	1.50041	0.00804593	0.0779184	0.0682009	2878	tags=29%, list=16%, signal=24%	CD8B/IFNG/ZAP70/IL2/IL4/CD8A/PRKCQ/TNF/CD3E/PTPRC/LCK/VAV1/GRAP2/CD40LG/PDCD1/PIK3CD/ITK/CD3D/ICOS/CTLA4/CD3G/PPP3R2/CD4/NFATC1/LAT/CD28/LCP2/AKT3/FYN/CD247/PIK3CG
KEGG_B_CELL_RECEPTOR_SIGNALING_PATHWAY	KEGG_B_CELL_RECEPTOR_SIGNALING_PATHWAY	KEGG_B_CELL_RECEPTOR_SIGNALING_PATHWAY	75	0.527025	1.52403	0.00956897	0.0880345	0.0770553	2878	tags=27%, list=16%, signal=22%	CR2/CD22/CD79A/CD19/CD79B/FCGR2B/BTK/VAV1/CD72/PLCG2/PIK3CD/RAC2/PIK3AP1/PPP3R2/PRKCB/NFATC1/AKT3/SYK/RASGRP3/PIK3CG
KEGG_TYPE_I_DIABETES_MELLITUS	KEGG_TYPE_I_DIABETES_MELLITUS	KEGG_TYPE_I_DIABETES_MELLITUS	41	0.606012	1.60588	0.0104971	0.0919744	0.0805039	2594	tags=63%, list=14%, signal=54%	PRF1/LTA/IFNG/GZMB/IL2/GAD1/IL12A/TNF/HLA-G/HLA-DQA2/HLA-DQB1/CD80/HLA-DPA1/IL12B/HLA-DMB/HLA-DOB/HLA-DRA/HLA-DRB1/HLA-DQA1/FASLG/HLA-DOA/HLA-DPB1/CD28/HLA-DRB5/HLA-DMA/PTPRN
KEGG_ANTIGEN_PROCESSING_AND_PRESENTATION	KEGG_ANTIGEN_PROCESSING_AND_PRESENTATION	KEGG_ANTIGEN_PROCESSING_AND_PRESENTATION	80	0.509262	1.49897	0.0137298	0.112461	0.0984356	3322	tags=36%, list=18%, signal=30%	CD8B/LTA/KIR3DL2/CD8A/HLA-G/HLA-DQA2/HLA-DQB1/KLRC2/HLA-DPA1/HLA-DMB/HLA-DOB/HLA-DRA/HLA-DRB1/HLA-DQA1/KLRD1/HLA-DOA/CD4/HLA-DPB1/KIR2DL4/HLA-DRB5/IFI30/HLA-DMA/KLRC4/KIR3DL1/CD74/CIITA/HSPA1A/TAP1/TAP2
KEGG_JAK_STAT_SIGNALING_PATHWAY	KEGG_JAK_STAT_SIGNALING_PATHWAY	KEGG_JAK_STAT_SIGNALING_PATHWAY	155	0.436135	1.38226	0.0140576	0.112461	0.0984356	2982	tags=26%, list=17%, signal=22%	IFNK/EPO/GH1/CSF3/IL22/IL21R/IFNG/IL13/CSF2RA/IL12RB1/IL2RG/IL2/CSF2RB/IL4/IL12A/GH2/IL5RA/SPRY2/SPRY4/SOCS1/IL12B/PIK3CD/CCND2/OSM/IL12RB2/JAK3/IL10RA/IL15RA/IL6/IL7R/IL3RA/AKT3/TSLP/IL15/SPRY1/SOCS2/PIK3CG/IL21/IL11RA/CSF3R
KEGG_CARDIAC_MUSCLE_CONTRACTION	KEGG_CARDIAC_MUSCLE_CONTRACTION	KEGG_CARDIAC_MUSCLE_CONTRACTION	73	0.500222	1.44275	0.0235038	0.180196	0.157723	4406	tags=42%, list=25%, signal=32%	CACNG2/TNNI3/CACNG7/CACNA1F/CACNA1S/CACNG6/ATP1B2/MYH7/COX8C/COX6A2/TNNC1/COX7B2/ATP1A3/FXYD2/ATP1A2/COX4I2/TNNT2/ACTC1/CACNA2D1/CACNA2D3/CACNA2D4/MYL3/ATP1B1/TPM2/CACNA2D2/MYH6/TPM1/CACNA1C/SLC8A1/MYL2/CACNG8
KEGG_HEDGEHOG_SIGNALING_PATHWAY	KEGG_HEDGEHOG_SIGNALING_PATHWAY	KEGG_HEDGEHOG_SIGNALING_PATHWAY	56	0.52916	1.46391	0.0285898	0.207656	0.181759	3072	tags=38%, list=17%, signal=31%	WNT3A/GLI2/LRP2/ZIC2/BMP4/WNT6/WNT10B/WNT16/IHH/GLI1/WNT9B/BMP8B/WNT1/PTCH2/WNT9A/SMO/WNT8A/WNT4/BMP6/HHIP/BMP7
KEGG_NATURAL_KILLER_CELL_MEDIATED_CYTOTOXICITY	KEGG_NATURAL_KILLER_CELL_MEDIATED_CYTOTOXICITY	KEGG_NATURAL_KILLER_CELL_MEDIATED_CYTOTOXICITY	131	0.443631	1.38168	0.0293427	0.207656	0.181759	4652	tags=44%, list=26%, signal=32%	PRF1/CD48/IFNG/ZAP70/GZMB/NCR3/KIR3DL2/ICAM1/TNF/LCK/VAV1/HLA-G/ITGAL/SH2D1A/ITGB2/PLCG2/KLRC2/NCR1/ICAM2/PIK3CD/RAC2/PPP3R2/FASLG/KLRD1/PRKCB/NFATC1/LAT/PRKCG/LCP2/KIR2DL4/SYK/KIR3DL1/ULBP1/FYN/CD247/FCER1G/PIK3CG/FCGR3A/CD244/TYROBP/PIK3R5/ULBP3/HCST/PAK1/KLRC3/SHC4/HLA-E/IFNA10/PTK2B/KLRK1/PPP3CC/TNFRSF10D/IFNA8/PTPN6/NFATC4/KIR2DL3/MICB
KEGG_DILATED_CARDIOMYOPATHY	KEGG_DILATED_CARDIOMYOPATHY	KEGG_DILATED_CARDIOMYOPATHY	90	0.47031	1.39699	0.031211	0.212697	0.186171	4406	tags=48%, list=25%, signal=36%	CACNG2/TNNI3/CACNG7/CACNA1F/CACNA1S/ITGA11/CACNG6/ITGA10/TNF/MYH7/TNNC1/ITGA4/ITGB3/PLN/DMD/TNNT2/ITGB7/LAMA2/ACTC1/ITGA5/SGCG/CACNA2D1/ITGA2B/CACNA2D3/SGCB/SGCA/CACNA2D4/ADCY4/MYL3/TPM2/CACNA2D2/ADCY9/MYH6/TPM1/GNAS/TTN/PRKX/TGFB3/CACNA1C/SLC8A1/ADCY3/MYL2/CACNG8
KEGG_BASAL_CELL_CARCINOMA	KEGG_BASAL_CELL_CARCINOMA	KEGG_BASAL_CELL_CARCINOMA	55	0.510383	1.4146	0.0369881	0.243065	0.212751	2636	tags=33%, list=15%, signal=28%	WNT3A/GLI2/BMP4/WNT6/WNT10B/WNT16/GLI1/FZD8/LEF1/FZD10/WNT9B/WNT1/PTCH2/WNT9A/SMO/TCF7L1/WNT8A/WNT4
KEGG_MELANOGENESIS	KEGG_MELANOGENESIS	KEGG_MELANOGENESIS	101	0.450977	1.36445	0.0403917	0.252784	0.221258	2636	tags=24%, list=15%, signal=20%	POMC/WNT3A/CAMK2B/WNT6/WNT10B/WNT16/FZD8/LEF1/FZD10/WNT9B/KITLG/CALML3/CREB3L3/WNT1/EDNRB/PRKCB/WNT9A/CALML5/PRKCG/TCF7L1/TYRP1/PLCB2/WNT8A/WNT4
KEGG_MAPK_SIGNALING_PATHWAY	KEGG_MAPK_SIGNALING_PATHWAY	KEGG_MAPK_SIGNALING_PATHWAY	266	0.390606	1.27714	0.0412148	0.252784	0.221258	4595	tags=32%, list=26%, signal=24%	FGF4/FGF3/CACNG2/FGF20/FGF23/PLA2G2E/CACNG7/CACNA1F/CACNA1S/FGF22/MAP4K1/PTPN7/BDNF/FGF21/CACNG6/NTRK1/FGF18/FGF10/RASGRP2/FGF5/TNF/FGF17/FGF7/FGFR1/FGF1/RAC2/PLA2G2A/FLNC/MAPK8IP2/PPP3R2/FASLG/PRKCB/NR4A1/FGF8/PRKCG/MEF2C/AKT3/FLNA/PDGFRB/FGF11/IL1R2/RASGRP3/HSPA1A/FGFR4/FGF2/NTRK2/RASGRP1/PLA2G12B/CACNA1A/CACNA2D1/EGF/DUSP8/CACNA1B/PLA2G4E/CACNA2D3/NFKB2/CACNA2D4/FGF9/MAPK12/PDGFA/PLA2G5/MAP3K1…
KEGG_VIBRIO_CHOLERAE_INFECTION	KEGG_VIBRIO_CHOLERAE_INFECTION	KEGG_VIBRIO_CHOLERAE_INFECTION	52	0.50835	1.39205	0.0483871	0.279678	0.244798	5313	tags=46%, list=30%, signal=33%	ATP6V1G3/CFTR/ATP6V1B1/PLCG2/ATP6V0D2/ATP6V0A4/PRKCB/PRKCG/TCIRG1/ATP6V1C2/ATP6V1E2/ADCY9/PDIA4/GNAS/PRKX/ATP6V1B2/ADCY3/ATP6V0C/ATP6V0E2/ATP6V1F/ATP6V1G2/ACTB/SEC61B/PRKACA

## Sheet: Table S5
Supplementary Table 5: Drug prediction for key genes
Drug	Adjusted.P.value	Odds.Ratio	Combined.Score
Maltotriose	0.0270703	220.189	1830.18
HEMATOXYLIN	0.0270703	158.618	1216.57
Disodium	0.0644365	311.953	1656.47
ACRYLAMIDE	0.0644365	243.366	1233.69
Toluidine	0.0644365	226.739	1133.79

## Sheet: Table S6
Supplementary Table 6: Information on the key genes and the proteins they encode and related functions
Gene	Ensembl	Protein name	Protein function	Biological process	Location	Disease involvement
AHNAK	ENSG00000124942	Neuroblast Differentiation-Associated Protein AHNAK	May be required for neuronal cell differentiation	neuronal cell differentiation	Nucleus	Neuroblastoma
CSPG4	ENSG00000173546	Melanoma-Associated Chondroitin Sulfate Proteoglycan	Proteoglycan playing a role in cell proliferation and migration which stimulates endothelial cells motility during microvascular morphogenesis	cell proliferation and migration	extracellular, plasma membrane	Melanoma
NCAM1	ENSG00000149294	Antigen Recognized By Monoclonal Antibody 5.1H11	This protein is a cell adhesion molecule involved in neuron-neuron adhesion, neurite fasciculation, outgrowth of neurites	cell adhesion	cytosol, extracellular, plasma membrane	Rabies
