# Supplementary material for: Integrated multi-omics analysis reveals key genetic, metabolic, and microbial drivers in bladder cancer insights into molecular subtyping and therapeutic approaches: A tumor marker prognostic study
Source: Research Square preprint supplement (doi:10.21203/rs.3.rs-5898970/v1), 2025-01-28
Supplement: Supplementary file 2 [file 46bc73c70a631947d061554b.docx]

**Fig.1: Identification of DEGs, SMGs and DEMs.**

**a** Volcano map of DEGs. **b** Heat map of DEGs. **c** GO enrichment analysis showing the CC, BP, and MF involved in DEGs. **d** KEGG enrichment analysis showing the signaling pathways involved in DEGs. **e** Pie chart showing the distribution of seven mutation types as well as mutation frequencies in 78 SMGs. **f** GO enrichment analysis showing the CC, BP, and MF involved in SMGs. **g** KEGG enrichment analysis showing the signaling pathways involved in SMGs. **h** Levels of KEGG pathway activation in SMGs analyzed by OncoboxPD. **i** Volcano map of DEMs. **j** Heat map of DEMs. **k** KEGG enrichment analysis showing the signaling pathways involved in DEMs.

**Fig.2: Identification of differential microbiomes.**

**a** Intratumoural microbiome abundance at the phylum level. **b** Intratumoural microbiome abundance at the family level. **c** Intratumoural microbiome abundance at the genus level. **d** Branching plots showing abundance of differential microorganisms. **e** LDA scores for differential microorganisms. **f** Five differential microbiomes at the genus level. **g** KEGG enrichment analysis showing the signaling pathways involved in differential microbiomes. **h** Driving colony prediction. Red: only in cancer, Green: only in control, Blue: in both.

**Fig.3: Somatic mutation analysis. a** Somatic mutations in BLCA patients in the TCGA-BLCA dataset and WES sequencing data. **b** Mutation frequency and type in BLCA patients in WES sequencing data (upper) and TCGA-BLCA (lower). **c** Amplification (upper) and deletion (lower) of CNVs.

**Fig.4: Identification and function analysis of candidate genes.**

**a** Identification of candidate genes. **b** GO enrichment analysis showing the CC, BP, and MF involved in candidate genes. **c** KEGG enrichment analysis showing the signaling pathways involved in candidate genes. **d** Expression analysis of seven differentially expressed candidate genes with prognostic value between groups in transcriptome sequencing data, TCGA-BLCA, and GSE13507. **e** ROC curve for the seven genes screened for five biomarkers with AUCs > 0.7.

**Fig.5: Identification of key genes, metabolites and microbiomes. a** Three key genes from key gene 1 and key gene 2. **b** A total of 90 key metabolites from key metabolite 1 and key metabolite 2. **c** Two key microbiomes from key microbiome 1 and key microbiome 2. **d** Heatmap showing relevance of key genes, metabolites, and key microbiomes. **e** Interactive network diagram of key genes, metabolites, and key microbiomes.

**Fig.6: Cluster analysis.**

**a, b** Consensus clustering to two BLCA clusters.k =2 (**a**) and cutoff = 0.44 (**b**). **c** Volcano map of inter-cluster DEGs. **d** Heat map of inter-cluster DEGs. **e** GO enrichment analysis showing the CC, BP, and MF involved in inter-cluster DEGs. **f** KEGG enrichment analysis showing the signaling pathways involved in inter-cluster DEGs. **g** Association networks between microbial communities in different clusters. **h** Volcano map of inter-cluster differential metabolites. **i** Heat map of inter-cluster differential metabolites. **j** KEGG enrichment analysis showing the signaling pathways involved in inter-cluster differential metabolites. **k** GSVA results for two clusters.

**Fig.7: Tumour immune microenvironment in different clusters.**

**a** Differences of pathways in the tumour immune microenvironment between cluster 1 and cluster 2. **b** Pathway scores between cluster 1 and cluster 2. **c** Abundance of immune cells. **d** Differences in immune cell infiltration between cluster 1 and cluster 2. **e** Correlation of key genes with immune cells. **f** Differences in the expression of immune checkpoint genes between samples of different clusters. **g** Differences in the activity of circulatory pathways of cancer immunity between clusters. **h** TIDE score of cluster 1 and cluster 2. **i** Correlations showing the relationship of key genes to stromal score, immune score and ESTIMATE score. **j** Association of immunotherapy, key genes and key metabolites. **k** Correlation network of key microorganisms with MHC molecules, immunostimulators, and immunoinhibitors.

**Fig.8: Gene mutations in clusters of BLCA.**

**a** Mutational landscape of top 20 most commonly mutated genes in different clusters. **b** Variant classification, variant type, and base mutations among different clusters. **c** Mutational differences in typical oncogenic pathways between clusters. **d** Agents were available in the CTRP, GDSC, and PRISM datasets. **e** Correlation between key genes and 63 chemotherapeutic agents. **f** Correlation analysis among key genes, targeted agents, classical therapeutic pathways, and pathways. **g** Differences in the expression of three key genes between clusters.

**Fig.9: Expression of key genes.**

**a** Correlation of key genes with clinical characteristics. **b-d** KEGG enrichment analysis showing the signaling pathways involved in three key genes. Three key genes were AHNAK (**b**), CSPG4 (**c**), and NCAM1 (**d**). **e** Molecular structure of maltotriose. **f** Molecular docking of key genes (AHNAK, CSPG4, and NCAM1) and maltotriose. **g** Expression of individual key genes in pan-cancer data. **h** Expression levels of key genes (AHNAK, CSPG4, and NCAM1) in different tissues. **i** Expression of key genes (AHNAK, CSPG4, and NCAM1) at the protein level in cancer and normal samples.

**Fig.10: Nine cell types at single-cell dataset.**

**Fig.11: Single-cell analysis.**

**a** UMAP of cell types after annotation in all samples, cancer samples and normal samples, respectively. **b** Distribution of key genes across cell types. **c** UMAP map of fibroblasts. **d** PPI network of top 10 specific highly expressed genes in fibroblasts. **e** KEGG enrichment analysis showing the signaling pathways involved in cell types. **f** Key cells annotated to five subtypes. **g** Expression and enrichment pathways of marker genes in various subtypes of key cells. **h** Expression of key genes in each key cell subtype. **i** Pseudo-time analysis of key cells. **j** Expression of key genes in key cell differentiation trajectories in different time stages. **k** Coregulator modules and their representative transcription factors and binding motifs for each key cell subtype.

**Fig.12: Directed network diagrams between transcription factors and key genes.**

**a** iCAFs. **b** matCAFs. **c** myCAFs. **d** tCAFs. **e** vCAFs.

**Fig.13: Analysis of cellular malignancy.**

**a** UMAP for downscaling cluster analysis of epithelial cells. **b** CNV analysis of various subclusters of epithelial cells. **c** Distribution of high malignancy, middle malignancy and low malignancy. **d** CNV scores of cell subclusters. **e** Pseudo-time analysis of epithelial cells. **f** Expression of key genes during different pseudo-time and subcluster differentiation of cells with different degrees of malignancy. **g** Expression analysis of key genes in subclusters of cells with different degrees of malignancy.

**Supplementary Figures:**

**Fig.S1: Analysis of sequencing data.**

**a** Expression of transcriptome samples. Four samples numbered 36, 37, 38 and 39 were excluded, the upper figure is before exclusion the lower figure is after exclusion. **b** PCA for two groups of samples from transcriptome sequencing data. **c** Correlation analysis between samples. **d** PCA for two groups of samples from metabolome sequencing data. **e** Sparse curves for intratumoural microbiome sequencing data. **f** Rank-abundance curves demonstrating the abundance and evenness of the samples. **g** The species cumulative box plot.

**Fig.S2: Microbiological diversity analysis.**

**a** Alpha diversity for intratumoural microbial with the Simpson, Shannon, InvSimpon and Pielou indices. **b** Principal coordinate analysis of Beta diversity in intratumoral microorganisms by Bray-Curtis, Jaccard, Weighted Unifrac, and Unweighted Unifrac distances. **c** Non-metric MultiDimensional Scaling analysis between the two sample groups.

**Fig.S3: Indicators of drive flora in disease and control groups.**

**Fig.S4: Kaplan-Meier survival curves showing significant survival differences for 15 genes.**

**Fig.S5: Correlation analysis.**

**a, b** Spearman analysis between biomarkers and DEMs for key gene 1 and key metabolite 1. **c, d** Spearman analysis between biomarkers and differential microbes for key gene 2 and key microbiome 1. **e, f** Spearman analysis between DEM and differential microbes for key metabolite 2 and key microbiome 2.

**Fig.S6: GSEA results with top 20 for two clusters.**

**Fig.S7: Drug prediction.**

**a-c** Analysis of differences in drug response (AUC values) between clusters in CTRP (**a**), GDSC (**b**) and PRISM (**c**) databases. **d-f** Common chemotherapeutic agents between two clusters: docetaxel (**d**), erlotinib (**e**), and lapatinib (**f**). **g-j** IC50 differences between FGFR inhibitors and EGFR inhibitors at cluster level. FGFR inhibitors: PD173078 (**g**) and AZD4547 (**h**). EGFR inhibitors: afatinib (**i**) and gefitinib (**j**).

**Fig.S8: Differences in expression of key metabolites between BLCA clusters.**

**Fig.S9: Association analysis of clinical characteristics of key genes.**

**a** Analysis of AHNAK expression between different clinical subgroups in the TCGA-BLCA dataset. **b** Analysis of CSPG4 expression between different clinical subgroups in the TCGA-BLCA dataset. **c** Analysis of NCAM1 expression between different clinical subgroups in the TCGA-BLCA dataset.

**Fig.S10: KM survival curves showing overall survival of patients in high and low expression sets of AHNAK in different clinical subgroups.**

**Fig.S11: KM survival curves showing overall survival of patients in high and low expression sets of CSPG4 in different clinical subgroups.**

**Fig.S12: KM survival curves showing overall survival of patients in high and low expression sets of NCAM1 in different clinical subgroups.**

**Fig.S13: Boxplots of the expression of each key gene in the pan-cancer data.**

**Fig.S14: Single-cell analysis.**

**a, b** Quality control of single-cell data. **a** before, **b** after. **c** Top 2000 highly variable genes. **d** PCA dimensionality analysis. **e** 32 cell clusters. **f** Marker genes specifically highly expressed in each cell cluster. **g** Heat map of top 10 marker genes and their enrichment status in each cell type. **h** Downscaling cluster analysis of fibroblasts. **i** Analysis of the percentage of key cell subtypes. **j** Regulator activity in each key cell subtype. **k** Core regulators that regulate downstream functions in each key cell subtype.

**Fig.S15: Cellular communication analysis.**

**a** Cellular communication results in normal samples. **b** Cellular communication results in cancer samples. **c** Heatmap of cell signaling pathway strengths in normal and cancer. **d** Cell signaling pathway flow value distribution.

**Fig.S16: Communication between individual cells in each signaling pathway.**
